# Genome-wide association studies of brain structure and function in the UK Biobank

Lloyd T. Elliott<sup>1</sup>, Kevin Sharp<sup>1</sup>, Fidel Alfaro-Almagro<sup>2</sup>, Sinan Shi<sup>1</sup>, Karla Miller<sup>2</sup>,  
Gwenaëlle Douaud<sup>2</sup>, Jonathan Marchini<sup>1,3†‡</sup>, Stephen Smith<sup>2†‡</sup>

<sup>1</sup> Department of Statistics, University of Oxford, Oxford, UK.

<sup>2</sup> FMRIB, Wellcome Centre for Integrative Neuroimaging, University of Oxford, Oxford, UK.

<sup>3</sup> The Wellcome Centre for Human Genetics, University of Oxford, Oxford, UK.

<sup>†</sup> These authors jointly directed this work.

<sup>‡</sup> Correspondence to: [marchini@stats.ox.ac.uk](mailto:marchini@stats.ox.ac.uk), [steve@fmrib.ox.ac.uk](mailto:steve@fmrib.ox.ac.uk)

## Summary

The genetic basis of brain structure and function is largely unknown. We carried out genome-wide association studies of 3,144 distinct functional and structural brain imaging derived phenotypes in UK Biobank (discovery dataset 8,428 subjects). We show that many of these phenotypes are heritable. We identify 148 clusters of SNP-imaging associations with lead SNPs that replicate at  $p < 0.05$ , when we would expect 21 to replicate by chance. Notable significant and interpretable associations include: iron transport and storage genes, related to changes in T2\* in subcortical regions; extracellular matrix and the epidermal growth factor genes, associated with white matter micro-structure and lesion volume; genes regulating mid-line axon guidance development associated with pontine crossing tract organisation; and overall 17 genes involved in development, pathway signalling and plasticity. Our results provide new insight into the genetic architecture of the brain with relevance to complex neurological and psychiatric disorders, as well as brain development and aging. The full set of results is available on the interactive Oxford Brain Imaging Genetics (BIG) web browser.

## 36 **Main text**

37

38 Brain structure and function are known to vary between individuals in the human  
39 population and can be measured non-invasively using Magnetic Resonance Imaging  
40 (MRI). Disease effects seen in MRI data have been identified in many neurological  
41 and psychiatric disorders such as Alzheimer's disease, Parkinson's disease,  
42 schizophrenia, bipolar disorder and autism<sup>1</sup>. MRI can provide intermediate or endo-  
43 phenotypes that can be used to assess the genetic architecture of such disorders.

44

45 Structural MRI measures of brain anatomy include tissue and structure volumes, such  
46 as total grey matter volume and hippocampal volume, while other MRI modalities  
47 allow the mapping of different biological markers such as venous vasculature,  
48 microbleeds and aspects of white matter (WM) micro-structure. Brain function is  
49 typically measured using task-based functional MRI (tfMRI) in which subjects  
50 perform tasks or experience sensory stimuli, and uses imaging sensitive to local  
51 changes in blood oxygenation and flow caused by brain activity in grey matter. Brain  
52 connectivity can be divided into functional connectivity, where spontaneous temporal  
53 synchronisations between brain regions are measured using fMRI with subjects  
54 scanned at rest, and structural connectivity, measured using diffusion MRI (dMRI),  
55 which images the physical connections between brain regions based on how water  
56 molecules diffuse within white matter tracts. For those not familiar with the  
57 neuroimaging field, we have provided a glossary in **Supplementary Note 1**.

58

59 A new resource for relating neuroimaging measures to genetics is UK Biobank, a rich,  
60 long-term prospective epidemiological study of 500,000 volunteers<sup>2</sup>. Participants  
61 were 40–69 years of age at baseline recruitment, a major aim being to acquire as rich  
62 data as possible before disease onset. Identification of disease risk factors and early  
63 markers will increase over time with emerging clinical outcomes<sup>3</sup>. A brain and body  
64 imaging extension will scan 100,000 participants by 2020, with brain imaging  
65 including three structural modalities, resting and task fMRI, and diffusion MRI<sup>4</sup>  
66 (**Supplementary Table 1**). A fully automated image processing pipeline removes  
67 artefacts and renders images comparable across modalities and participants. The  
68 pipeline also generates thousands of image-derived phenotypes (IDPs), distinct  
69 individual measures of brain structure and function<sup>5</sup>. Example IDPs include the

70 volume of grey matter in many distinct brain regions, and measures of functional and  
71 structural connectivity between specific pairs of brain areas. The combination of very  
72 large subject numbers with richly multimodal imaging data collected on  
73 homogeneous imaging hardware and software is a unique feature of UK Biobank.

74

75 Another key component of the UK Biobank resource has been the collection of  
76 genome-wide genetic data using a purpose-designed genotyping array. A custom  
77 quality control, phasing and imputation pipeline was developed to address the  
78 challenges specific to the experimental design, scale, and diversity of the UK Biobank  
79 dataset. The genetic data was publicly released in July 2017 and consists of ~96  
80 million genetic variants in ~500,000 participants.<sup>6</sup>

81

82 Joint analysis of the genetic and brain imaging datasets produced by UK Biobank  
83 presents a unique opportunity for uncovering the genetic bases of brain structure and  
84 function, including genetic factors relating to brain development, aging and disease.  
85 In this study, we carried out genome-wide association studies (GWAS) for 3,144  
86 IDPs, covering the entire brain and including “multi-modal” information of grey  
87 matter volume, area and thickness, white matter connections and functional  
88 connectivity, at 11,734,353 SNPs (single-nucleotide polymorphisms) in up to 8,428  
89 individuals having both genetic and brain imaging data. We used two separate sets of  
90 data from UK Biobank to evaluate replication of significant genetic associations from  
91 the discovery phase. We also carried out multi-trait GWAS, SNP-heritability analysis,  
92 genetic correlation analysis of IDPs with brain-related traits and an analysis of  
93 enrichment of genomic regions with different functions. Previous large-scale GWAS  
94 imaging studies have focussed on narrower ranges of phenotypes including studies of:  
95 grey matter volume in 7 localised regions of the subcortical brain by combining data  
96 across >50 different studies<sup>7,8</sup>; whole brain grey matter volumes and thicknesses by  
97 combining data from 59 acquisition sites<sup>9</sup>; and cortico-cortical white matter  
98 connections in healthy young adult twins<sup>10</sup>. We expect that homogeneous image  
99 acquisition and genetic data assay in UK Biobank will have a positive impact on the  
100 power of our study.

101

102 The full set of results are available on the Oxford Brain Imaging Genetics (BIG) web  
103 browser that allows users to browse associations by SNP, gene or phenotype. This

browser was built from the PheWeb code base and extended to allow easier searching of phenotypes. In addition to the brain IDP GWAS results, the browser also includes GWAS results from more than 2,500 other traits and diseases (see **URLs**).

#### Heritability and genetic correlations of IDPs

**Figure 1** shows the estimated SNP-heritability ( $h^2$ ) of all IDPs and whether  $h^2$  is significantly different from 0 at the nominal 5% significance level (see also **Supplementary Table 2 and Supplementary Figure 1**). 1,578 of 3,144 IDPs show significant SNP-heritability. Of the structural MRI IDPs, volumetric measures are the most heritable and cortical thicknesses the least. Of the diffusion MRI measures, the tractography-based IDPs show lower heritability than the tract-skeleton-based IDPs. The resting-state fMRI functional connectivity edges show the lowest levels of SNP-heritability, with just 235 of 1,771 IDPs significant, which is consistent with additive heritability estimates from twin studies of network edges from fMRI and MEG in the Human Connectome Project<sup>11</sup>. However, 4 of the 6 rfMRI ICA features (estimated as data-driven reductions of this full set of fMRI edges) are much more highly heritable. In contrast the resting-state node amplitude IDPs do mostly show significant evidence of SNP-heritability; the task fMRI IDPs do not.

We found lower levels of SNP-heritability for sub-cortical volumes than previously estimated in twin studies<sup>12-14</sup> (**Supplementary Figure 2**). This is typical of many traits in the literature<sup>15</sup> and maybe due to twin study estimates being upwardly biased due to gene-gene and gene-environment interactions<sup>16,17</sup>, or downward bias of SNP-heritability due to uncaptured rare genetic variation. We also compared the GWAS results for 7 subcortical volumes with those obtained by the ENIGMA consortium, via a genetic correlation analysis (**Supplementary Table 3**). We find a strong correlation between the studies, suggesting no major differences between how these phenotypes have been measured. In all cases a perfect genetic correlation of 1 lies within the 95% confidence intervals.

**Supplementary Figure 3** shows the genetic correlations, together with the raw phenotype correlations, for several groups of analysed IDPs. These plots show that there is a range of both strong and weak, positive and negative genetic correlations between the IDPs.

## 138 Significant associations between IDPs and SNPs

139

140 In all analyses we estimated genetic effects with respect to the number of copies of  
 141 the *non-reference allele*. Using a minor allele frequency filter of 1% and a  $-\log_{10}$  p-  
 142 value threshold of 7.5, we found 1,262 significant associations between SNPs and the  
 143 3,144 IDPs. These associations span all classes of IDPs, except task fMRI  
 144 (**Supplementary Table 4**), with the swMRI T2\* group showing a relatively large  
 145 number of associations. The  $-\log_{10}$  p-value threshold of 7.5 controls for the number  
 146 of tests carried out across SNPs and takes into account the correlation structure  
 147 between genetic variants. 844 and 455 of these 1,262 associations replicated at the 5%  
 148 significance level using our two smaller replication datasets (**Methods** and  
 149 **Supplementary Table 5**). Some associated genetic loci overlap across IDPs; we  
 150 estimate that there are approximately 427 distinct associated genetic regions  
 151 (“clusters”), and 148 of these “clusters” have a lead SNP that replicates at the 5%  
 152 level in our replication set of 3,456 participants, and 91 below a 5% False Discovery  
 153 Rate (FDR) threshold. We would expect ~21 of the lead SNPs in the 148 clusters to  
 154 replicate under a null hypothesis of no association.

155

156 At a threshold of  $-\log_{10}$  p-value  $> 11$ , which additionally corrects for all 3,144  
 157 GWAS carried out (see **Methods**), we find 368 significant associations between  
 158 genetic regions and distinct IDPs (**Supplementary Table 6, Supplementary Figure**  
 159 **4**). These associations with 78 unique SNPs can be grouped together into 38 distinct  
 160 clusters by grouping across IDPs (**Table 1**). Taking our lead SNP in each of the 38  
 161 regions, we find that all 38 have  $p < 0.05$  in our replication set of 3,456 participants,  
 162 and all 38 are significant at 5% FDR. We found no appreciable change in these  
 163 GWAS results when we included a set of potential body confound measures in  
 164 addition to the main set of imaging confound measures (see **Methods** and  
 165 **Supplementary Figure 5**). We also carried out a Winner’s Curse corrected post-hoc  
 166 power analysis that agrees well with the results of our replication studies.  
 167 (**Supplementary Note 2**).

168

169 **Supplementary Figures 6 and 7** provide genome-wide association plots (also known  
 170 as Manhattan plots) and QQ-plots for all 3,144 IDPs and the subset of IDPs listed in  
 171 **Table 1**, respectively. Having identified a SNP as being associated with a given IDP,

172 it can be useful then to explore the association with all other IDPs via a PheWAS  
 173 (Phenome Wide Association Study) plot. **Supplementary Figure 8** shows the  
 174 PheWAS plots for all 78 SNPs listed in **Supplementary Table 6** with  $-\log_{10}p > 11$ .  
 175 The Oxford Brain Imaging Genetics (BIG) web browser (see **URLs**) allows  
 176 researchers to view the PheWAS for any SNP of interest. We found that 4 of the 78  
 177 SNPs were associated ( $p\text{-value} < 0.05/3144$ , i.e.,  $-\log_{10} p\text{-value} > 4.79$ ) with all 3  
 178 classes of structural, dMRI and functional measures, and these were all SNPs in  
 179 cluster 31 of **Table 1** (see pages 62-65 of **Supplementary Figure 8**. This genetic  
 180 locus is associated with the volume of the precuneus and cuneus, dMRI measures for  
 181 the forceps major (a fibre bundle connecting left and right cuneus), and two functional  
 182 connections (parcellation 100 edges 614 and 619, which connect the precuneus to  
 183 other cognitive networks). **Supplementary Figure 9** illustrates the sharing of  
 184 association signal across IDPs at the 615 unique SNPs listed in **Supplementary**  
 185 **Table 5**. **Supplementary Figure 10** shows the relationship between the number of  
 186 associations found and the estimated SNP heritability for each IDP.

187  
 188 Overall, our results clearly replicate the majority of the loci identified by the  
 189 ENIGMA consortium in two separate GWAS of 7 brain subcortical volume IDPs in  
 190 up to 13,171 subjects<sup>7</sup>, and of hippocampal volume in 33,536 subjects (although not  
 191 all reached genome-wide significance, likely due to the smaller sample size in our  
 192 study: **Supplementary Figure 11**). We also replicate an association between volume  
 193 of white matter hyperintensities (“lesions”) and SNPs in *TRIM47* (e.g., rs3744017,  
 194  $P=1.4E-12$ , cluster 37)<sup>18</sup>.

195  
 196 It can be challenging to precisely interpret the function of SNPs identified in GWAS.  
 197 We find that most of the SNPs in the 38 loci in **Table 1** are either in genes, including  
 198 7 missense SNPs and 2 SNPs in untranslated regions (UTRs), or in high linkage  
 199 disequilibrium (LD) with SNPs that are themselves in the genes of interest, and many  
 200 are significant expression quantitative trait loci (eQTLs) in the GTEx database<sup>19</sup>. In  
 201 total we find 17 genetic loci that can be linked to genes that broadly contribute to  
 202 brain development, patterning and plasticity (out of the 38 clusters reported in **Table**  
 203 **1**; for more details, see **Supplementary Note 3**). In what follows we focus on some of  
 204 the most compelling examples.

205

A major source of cross-subject differences seen in T2\* data is microscopic variations in magnetic field, often associated with iron deposition in ageing and pathology<sup>20</sup>. We identified many associations between T2\* measurements in the caudate, putamen and pallidum and SNPs in genes (*TF*, rs4428180,  $P_{\min}=2.23\text{E-}22$ , cluster 7; *HFE*, rs1800562 (missense)  $P_{\min}=6.6\text{E-}20$ , cluster 14; *SLC25A37*, rs35469695,  $P_{\min}=2.22\text{E-}12$ , cluster 18) or near genes (*FTH1*, rs11230859,  $P_{\min}=2.31\text{E-}17$ , cluster 26) known to affect iron transport and storage, as well as neurodegeneration with brain iron accumulation (NBIA)<sup>21</sup> (*COASY*, rs668799,  $P_{\min}=1.43\text{E-}17$ , cluster 36). In particular, a SNP in *HFE* (rs1800562) is associated with haemoglobin levels<sup>22</sup>, iron status biomarkers<sup>23</sup> and LDL cholesterol<sup>24</sup>. In addition to *TF*, which transports iron from the intestine, and *SLC25A37*, a mitochondrial iron transporter, we identified four further SNPs that are either coding SNPs for, or eQTLs of, genes involved in transport of nutrients and minerals: *SLC44A5* (rs76934732,  $P=8.51\text{E-}13$ , cluster 1), *SLC39A8/ZIP8* (rs13107325 (missense)  $P_{\min}=1.04\text{E-}42$ , cluster 10), *SLC20A2* (rs2923405,  $P_{\min}=3.31\text{E-}17$ , cluster 19) and *SLC39A12/ZIP12* (rs10764176 (missense),  $P_{\min}=3.3\text{E-}21$ , cluster 22).

Interrogating images at a voxel-wise level can provide further insight about detailed spatial localisation of SNP associations (e.g., a specific thalamic nucleus), as well as possibly identifying additional associated areas not already well captured by the IDPs (while keeping in mind the statistical dangers of potential circularity<sup>25</sup>). For instance, by looking at the difference between the average T2\* image from the subjects having 0 vs. 1 copy of the rs4428180 (*TF*) non-reference allele, effects of this SNP were found not just in the putamen and pallidum, but also in additional, much smaller or more localised regions of subcortical structures that were not included as IDPs (**Figure 2**). We similarly created in **Figure 2** the voxelwise differences associated with 3 additional SNPs, from the most significant GWAS associations with T2\* in the putamen as seen in the Manhattan plot. This approach also allowed us to observe grey matter volume effects across the entire brain associated with rs13107325 (*SLC39A8/ZIP8*) (**Figure 3**), which has been linked in many previous (non-imaging) GWAS to e.g., intelligence<sup>26</sup>, schizophrenia<sup>27</sup>, blood pressure<sup>28</sup> and higher risk of cardiovascular death<sup>29</sup>. These effects could now be observed in a very relevant brain region, the anterior cingulate cortex, which is well-known for its multifaceted roles



including precisely in fluid intelligence<sup>30</sup>, schizophrenia<sup>31</sup> and in modulating autonomic states of cardiovascular arousal<sup>32</sup>.

241

Interestingly, three SNPs related to our white matter IDPs were in genes or eQTLs of genes coding for three proteins of the extracellular matrix (ECM). The first SNP (rs2365715,  $P=5.38E-12$ , cluster 2), an eQTL of *BCAN*, is associated with one dMRI microstructural measure in the genu of the corpus callosum. The second SNP (rs3762515,  $P=4.27E-13$ , cluster 3), in the 5' UTR of *EFEMP1*, is associated with the volume of white matter lesions. Finally, the third SNP (rs67827860,  $P_{\min}=4.06E-37$ , cluster 11, **Figure 4**), located in an intron of *VCAN*, is in a cluster associated with multiple dMRI measures of most of the brain white matter tracts (199 IDPs in total). *BCAN* and *VCAN* in particular both code for chondroitin sulfate proteoglycans of the ECM, which are especially crucial for synaptic plasticity<sup>33</sup> and myelin repair<sup>34</sup>. *VCAN* is, for instance, increased in association with astrogliosis in multiple sclerosis<sup>35</sup>, while both *BCAN* and *VCAN* are differentially regulated following spinal cord injury<sup>36</sup>. *BCAN*, *EFEMP1* and *VCAN* have been further associated in three separate GWAS with stroke<sup>37</sup>, site of onset of amyotrophic lateral sclerosis<sup>38</sup> and major depressive disorder<sup>39</sup>, respectively. Furthermore, *EFEMP1* is characterised by tandem arrays of epidermal growth factor (EGF)-like domains, and we also identified a strong association between the whole of the corpus callosum (genu, body and splenium) and a SNP in *HBEGF* (rs4150221,  $P_{\min}=8.43E-20$ , cluster 13), a heparin-binding EGF-like growth factor. Similarly to *BCAN* and *VCAN*, *HBEGF* plays an important role in oligodendrocyte development and helps recovering WM injury in preterm babies<sup>40</sup>. Remarkably, this means that the vast majority of forebrain WM-related dMRI IDPs are associated in this study with SNPs related to genes coding for proteins involved either in the extracellular matrix, the epidermal growth factor, or both.

265

Two additional examples further illustrate highly meaningful correspondences between locations of our brain IDPs and significantly associated genes. First, the volume of the 4<sup>th</sup> ventricle, which develops from the central cavity of the neural tube, was found to be significantly associated with a SNP in, and eQTL of, *ALDH1A2* (rs2642636,  $P=5.2E-16$ , cluster 33). This gene codes for an enzyme which facilitates posterior organ development and prevents human neural tube defects, including spina bifida<sup>41</sup>. Second, we found two SNPs associated with dMRI IDPs of the crossing



pontine tract (the part of the pontocerebellar fibre bundle arising from pontine nuclei that decussate across the brain midline to project to contralateral cerebellar cortex) in genes that regulate axon guidance and fasciculation during development (*SEMA3D*, rs2286184,  $P=5.31E-17$ , cluster 15 and *ROBO3*, rs4935898 (missense),  $P=1.76E-19$ , cluster 27, **Figure 5**). The exact location of our IDP in the crossing fibres of the pons remarkably coincides with the function of *ROBO3*, which is specifically required for axons to cross the midline in the hindbrain (pons, medulla oblongata and cerebellum); mutations in *ROBO3* result in horizontal gaze palsy, a disorder in which the corticospinal and somatosensory axons fail to cross the midline in the medulla<sup>42</sup>. Notably, all three significant associations with the IDP of the crossing pontine tract were found using the mode of anisotropy (MO), which is a tensor-model dMRI measure particularly sensitive to regions of crossing fibres<sup>43</sup>.

#### Multi-phenotype association tests

One alternative strategy for analysing large numbers of IDPs is to use multi-trait tests that fit joint models of associations to groups of IDPs. Such approaches can utilise estimates of genetic correlation to boost power. In addition, by analysing  $P$  traits in one GWAS, these tests can avoid the need to correct for multiple genome-wide scans. We used a multi-trait test (see **Methods**) to analyse 23 groups of IDPs with up to 243 IDPs per group. These IDP groupings were chosen to cover the majority of the IDP classes with significant IDP correlations in each grouping (**Supplementary Table 7**). **Supplementary Figure 12** shows the Manhattan plots for these genome-wide scans. Overall across these 23 groups, we found 278 SNPs at ~160 loci associated with  $-\log_{10}$  p-value  $> 7.5$  (see **Supplementary Table 8**). We found that 170 of these 278 SNPs survived a correction for 23 scans with  $-\log_{10}$  p-value  $> 8.86$  and 138 of these 170 SNPs had a p-value  $< 0.05$  in the larger replication set of 3,456 samples. There can be quite large differences in p-values between the multi-trait tests and the individual IDP tests (**Supplementary Figure 13**), especially when taking account of the smaller number of tests carried out by the multi-trait approach (**Supplementary Figure 14**). We found 25 loci that showed both a significant and replicated multi-trait association for an IDP group, while showing no genome-wide significance in the flanking region for any individual IDP in the corresponding grouping (**Supplementary Table 9**).

307

308

309 Three of these loci show associations with the dMRI MO measures (rs62073157,  
310  $P=4.07E-11$ ; rs35884657,  $p=1.04E-09$ ; rs9939914,  $p=1.15E-11$ ) and all are eQTLs of  
311 microtubule related genes *MAPT*, *TUBA1B* and *TUBB3* respectively. The first SNP  
312 rs62073157 resides in a long stretch of LD (43.4-44.9Mb) on chromosome 17 known  
313 to contain a common inversion polymorphism<sup>44</sup>. This extended *MAPT* (encoding for  
314 Microtubule Associated Protein Tau) region has been repeatedly associated with  
315 several neurodegenerative disorders, such as Alzheimer's disease, where it has been  
316 shown to modulate the age of onset<sup>45</sup> and to be associated with *APOE*  $\epsilon 4$ - alleles<sup>46</sup>,  
317 fronto-temporal dementia<sup>47</sup> and progressive supranuclear palsy<sup>48</sup>. Notably, a locus in  
318 this *MAPT* region also shows overlap between Alzheimer's and Parkinson's disease<sup>49</sup>.  
319 Mutations in tubulin genes have been shown to correlate strongly with multiple  
320 cortical and subcortical abnormalities<sup>50</sup>.

321

322 Another example of the value of the multi-trait testing can be seen in the association  
323 between IDPs of global brain volume measurements and a SNP located between  
324 *BANK1* and *ZIP8*, previously identified in a GWAS of schizophrenia<sup>51</sup> (rs35518360,  
325  $P=4.07E-12$ ). This locus is also part of a multi-modal cluster from our single-trait  
326 GWAS that includes subcortical and cerebellar grey matter volumes, pallidum T2\*  
327 and dMRI in midbrain white matter tracts (cluster 10 in **Supplementary Table 6**).  
328 The multi-trait test thus made it possible to uncover this additional association  
329 between global brain volume measurement and this locus, which might prove relevant  
330 in better understanding observations of smaller brain volume in (first episode/drug-  
331 naïve) schizophrenic patients<sup>52</sup>.

332 Another locus (rs112651271,  $p=3.23E-11$ ) is associated with a dMRI IDP group  
333 encompassing all measurements collected in major white matter tracts. This SNP lies  
334 150Kb upstream of *EDNRA*, which plays a role in potent and long-lasting  
335 vasoconstriction, and (likely related to this), has been linked to hypertension and  
336 migraine, as well as intracranial aneurysm<sup>53</sup>.

337

338 The multi-trait analysis also uncovered an association with SNPs in the *IL34* gene  
339 (rs12928124,  $p=1.31E-10$ ) and Freesurfer brain volume IDPs. IL-34 is a ligand of the

CSF-1 receptor (CSF-1R) that regulates CNS microglial development and has been shown to regulate cortical development in mice<sup>54</sup>. IL-34 has also been shown to promote clearance of soluble oligomeric amyloid- $\beta$ , which mediates synaptic dysfunction and neuronal damage in Alzheimer's disease.<sup>55</sup>

#### Iron, cardiovascular traits and brain development in brain disorders

Of those genes involved in neurodegenerative disorders which we identified in our single-IDP association analysis, interestingly most mainly code for iron-related proteins. While *TF* and *HFE* might play a relevant role for iron mobilisation and regulation in neurodegenerative disorders such as Parkinson's disease, Creutzfeldt-Jakob disease, amyotrophic lateral sclerosis and Alzheimer's disease<sup>56,57</sup>, *SLC25A37* shows increased expression in Alzheimer's and Friedreich's ataxia<sup>58</sup> and mutations in *COASY* are associated with neurodegeneration with brain iron accumulation<sup>21</sup>.

One notable exception, is in an LD region encompassing significant SNPs in both *MRC1* and *ZIP12* (cluster 22), which has been linked to neurodegenerative/neuropsychiatric disorders and cardiovascular processes (as opposed to iron-related processes). SNPs in *MRC1* have been shown in a GWAS to be associated with risk of cardiovascular disease<sup>59</sup> and *MRC1* expression is increased in a model of Alzheimer's disease<sup>60</sup>, while *ZIP12* demonstrates altered expression in the cortex of subjects with schizophrenia<sup>61</sup>. Our significant SNPs in *ZIP8* (cluster 10) show a similar overlap, and *ZIP8* hit has been found associated both with schizophrenia and Parkinson's disease<sup>62</sup>, as well cardiovascular death<sup>29</sup>.

Similarly to *ZIP8* and *ZIP12*, of those genes related to mental health disorders identified both in the single-IDP and multi-trait analyses, most are strongly involved in brain development and plasticity. This is the case of *VCAN*, for which SNPs have been associated in a GWAS with major depressive disorder<sup>39</sup>, *SEMA3D* and *DAAMI*, which might both contribute to schizophrenia<sup>63 64</sup>, *ROBO3* that may be associated with autism<sup>65</sup> and *CTTNBP2*, for which disruption is related to autism<sup>66</sup>, and knockdown reduces the density and size of dendritic spines in neurons (rs12113919, eQTL of *CTTNBP2*,  $P=3.96E-12$ , cluster 16). This latter SNP was interestingly associated here with one dMRI measures in the corpus callosum, a white matter tract

that has been shown in dMRI meta-analyses to be the most consistently disrupted white matter tract in autism<sup>67,68</sup>.

#### Genetic correlation with neurodegenerative, psychiatric and personality traits

We measured the genetic correlation (hence also co-heritability) between a subset of heritable IDPs and 10 neurodegenerative, psychiatric and personality traits (see **Methods**). We found some suggestive evidence of elevated levels of non-zero genetic correlation for amyotrophic lateral sclerosis (ALS), schizophrenia and stroke, mainly with dMRI measures in white matter tracts (**Supplementary Figure 15**). The strongest genetic correlation for ALS ( $P < 10^{-3}$ ) was found in the genu of the corpus callosum (with a co-heritability of 0.63). This result is in line with consistent findings of corpus callosum involvement in this degenerative disorder<sup>69</sup>. Correlations found in schizophrenia with the tapetum ( $P < 10^{-3}$ ) were likely due to partial volume effects, given that the next most strongly associated IDPs reflect ventricular and thalamic volume, which are some of the most robust volumetric findings in this mental health disorder<sup>52</sup>; hence it is interesting to see the genetic input into this volumetric disease association. While more modest correlations in stroke were observed, it was across a wide range of dMRI IDPs, with the strongest genetic correlations ( $P < 10^{-2}$ ) in the corona radiata, internal capsule and thalamic radiations, i.e., white matter tracts that follow the probabilistic distribution of stroke<sup>70</sup>. **Supplementary Table 10** contains genetic correlation estimates for all IDP/trait combinations with nominal p-value  $< 0.01$ , to highlight which IDPs occur in the tails of these distributions. However, in line with previous observations [Bulik-Sullivan 2015], we also found evidence that the LDSC regression approach<sup>71</sup> for estimating genetic correlation seems best suited to pairs of traits both of which are heritable and polygenic in genetic aetiology. For example, the deflated p-value distribution for the correlation of IDPs with Alzheimer's is driven by the large *APOE* association for Alzheimer's disease on chromosome 19.

#### Partitioning heritability by functional annotation

We applied a statistical approach that partitions the additive genetic heritability of a set of common variants for each of the 3,144 IDPs according to 24 functional

annotations of the genome<sup>71</sup>. **Figure 6** summarizes which functional annotations show enrichment stratified by 23 groups of IDPs (see also **Supplementary Table 11**). We find that regions of the genome annotated as Super Enhancers and several histone modifications show enrichment across many of the structural and diffusion IDP groups. Regions of the genome enriched for histone modification H3K27me3 (and indicating strong evidence for silenced genes) show depletion of heritability across many of the IDP classes (**Supplementary Figure 16**). IDP groups such as T1 subcortical volumes, dMRI FA and ICVF show the strongest evidence of enrichment across multiple categories. The resting fMRI connectivity edge IDPs show no elevated enrichment, consistent with these traits showing low overall levels of heritability (**Figure 1**). **Supplementary Figure 17** provides the results of this partitioning analysis for each IDP.

## Conclusions

Bringing together researchers with backgrounds in brain imaging and genetic association was key to this work. We have uncovered a large number of associations at the nominal level of GWAS significance ( $-\log_{10} p\text{-value} > 7.5$ ) and at a more stringent threshold ( $-\log_{10} p\text{-value} > 11$ ) designed to (probably over-conservatively) control for the number of IDPs tested. Our use of multi-trait tests uncovered further novel loci. We find associations with all the main IDP groups except the task fMRI measures (despite these measures containing usable signal, for example having unique and strong cognitive associations<sup>4</sup>). We mainly found associations between our MRI measures and genes involved in brain development and plasticity, as well as with genes contributing to transport of nutrients and minerals. Most of these genes have also been demonstrated to contribute to a vast array of disorders including major depression disorder, cardiovascular disease, schizophrenia, amyotrophic lateral sclerosis and Alzheimer's disease. We further uncovered enrichments of functional annotations for many of the structural and diffusion IDPs.

A valuable aspect of this work has been to link the associated SNPs back to spatial properties of the voxel-level brain imaging data. For example, we have linked SNPs associated with IDPs to both highly spatially localized (**Figures 2,3,5**) and widely spatially distributed (**Figure 4**) effects, restricting these voxelwise analyses to the

same imaging modality from which the original phenotypic association was found (though of course other modalities could also be tested in the same way). In addition, looking at PheWAS plots has been useful when working with so many phenotypes. It has allowed investigation of the overall patterns of association and has led to the identification of SNP associations that span multiple modalities.

We have used two separate sets of 930 and 3,456 samples to replicate a large number of the associations uncovered at the discovery phase. Over the next few years, the number of UK Biobank participants with imaging data will gradually increase to 100,000, which will allow a much more complete discovery of the genetic basis of human brain structure, function and connectivity. Combining the discovery and replication samples will likely also lead to novel associations, as will the use of methods that can analyze the huge IDP  $\times$  SNP matrix of summary statistics of association. A potential avenue of research will involve attempting to uncover causal pathways that link genetic variants to IDPs and then onto a range of neurological, psychiatric and developmental disorders.

## Methods

### Imaging data and derived phenotypes

The UK Biobank Brain imaging protocol consists of 6 distinct modalities covering structural, diffusion and functional imaging, summarised in **Supplementary Table 1**. For this study, we primarily used data from the February 2017 release of ~10,000 participants' imaging data (and an additional ~5,000 subjects' data released in January 2018 provided the larger replication sample).

The raw data from these 6 modalities has been processed for UK Biobank to create a set of imaging derived phenotypes (IDPs)<sup>4,72</sup>. These are available from UK Biobank, and it is these IDPs from the 2017/18 data releases that we used in this study.

In addition to the IDPs directly available from UK Biobank, we created two extra sets of IDPs. Firstly, we used the FreeSurfer v6.0.0 software<sup>73,74</sup> to model the cortical surface (inner and outer 2D surfaces of cortical grey matter), as well as modelling

several subcortical structures. We used both the T1 and T2-FLAIR images as inputs to the FreeSurfer modelling. FreeSurfer estimates a large number of structural phenotypes, including volumes of subcortical structures, surface area of parcels identified on the cortical surface, and grey matter cortical thickness within these areas. The areas are defined by mapping an atlas containing a canonical cortical parcellation onto an individual subject's cortical surface model, thus achieving a parcellation of that surface. Here we used two atlases in common use with FreeSurfer: the Desikan-Killiany–Tourville atlas (denoted “DKT”<sup>75</sup>) and the Destrieux atlas (denoted “a2009s”<sup>76</sup>). The DKT parcellation is gyral-based, while Destrieux aims to model both gyri and sulci based on the curvature of the surface. Cortical thickness is averaged across each parcel from each atlas, and the cortical area of each parcel is estimated, to create two IDPs for each parcel. Finally, subcortical volumes are estimated, to create a set of volumetric IDPs.

Secondly, we applied a dimension reduction approach to the large number of functional connectivity IDPs. Functional connectivity IDPs represent the network “edges” between many distinct pairs of brain regions, comprising in total 1,695 distinct region-pair brain connections (see **URLs**). In addition to this being a very large number of IDPs from which to interpret association results, these individual IDPs tend to be significantly noisier than most of the other, more structural, IDPs. Hence, while we did carry out GWAS for each of these 1,695 connectivity IDPs, we also reduced the full set of connectivity IDPs into just 6 new summary IDPs using data-driven feature identification. We did this dimensionality reduction by applying independent component analysis (ICA<sup>77</sup>), applied to all functional connectivity IDPs from all subjects, to find linear combinations of IDPs that are independent between the different features (ICA components) identified<sup>78</sup>. We carried out the ICA feature estimation without any use of the genetic data, and we maximized independence between component IDP weights (as opposed to subject weights). We used split-half reproducibility (across subjects) to optimize both the initial dimensionality reduction (14 eigenvectors from a singular value decomposition was found to be optimal) and also the final number of ICA components (6 ICA components was optimal, with reproducibility of ICA weight vectors greater than  $r=0.9$ ). The resulting 6 ICA features were then treated as new IDPs, representing 6 independent sets (or, more accurately, linear combinations) of the original functional connectivity IDPs. These 6



new IDPs were added into the GWAS analyses. The 6 ICA features explain 4.9% of the total variance in the full set of network connection features, and are visualized in **Supplementary Figure 18**. More details of the ICA analysis of the resting state data, together with browsing functionality of the highlighted brain regions can be found on the FMRIB Biobank Resource web page (see **URLs**).

We organised all 3,144 IDPs into 9 groups (**Supplementary Table 12**), each having a distinct pattern of missing values (not all subjects have usable, high quality data from all modalities<sup>4</sup>). For the GWAS in this study we did not try to impute missing IDPs due to low levels of correlation observed across groups.

The distributions of IDP values varied considerably between phenotype classes, with some phenotypes exhibiting significant skew (**Supplementary Figure 19**) which would likely invalidate the assumptions of the linear regression used to test for association. To ameliorate this we quantile normalized each of the IDPs before association testing. This transformation also helps avoid undue influence of outlier values. We also (separately) tested an alternative process in which an outlier removal process was applied to the un-transformed IDPs; this gave very similar results for almost all association tests, but was found to reduce the significance of a very small number of associations. This possible alternative method for IDP “preprocessing” was therefore not followed through (data not shown).

### Genetic data processing

We used the imputed genetic dataset made available by UK Biobank in its July 2017 release<sup>6</sup>. This consists of >92 million autosomal variants imputed from the Haplotype Reference Consortium (HRC) reference panel<sup>79</sup> and a merged UK10K + 1000 Genomes reference panel. We first identified a set of 12,623 participants who had also been imaged by UK Biobank. We then applied filters to remove variants with minor allele frequency (MAF) below 0.1% and with an imputation information score below 0.3, which reduced the number of SNPs to 18,174,817. We then kept only those samples (subjects) estimated to have recent British ancestry using the sample quality control information provided centrally by UK Biobank<sup>6</sup> (using the variable *in.white.British.ancestry.subset* in the file *ukb\_sqc\_v2.txt*); population structure can be

a serious confound to genetic association studies<sup>80</sup>, and this type of sample filtering is standard. This reduced the number of samples to 8,522. The UK Biobank dataset contains a number of close relatives (3<sup>rd</sup> cousin or closer). We therefore created a subset of 8,428 nominally unrelated subjects following similar procedures in Bycroft et al. (2017). After running GWAS on all the (SNP) variants in the 8,428 samples we applied three further variant filters to remove variants with a HWE (Hardy-Weinberg equilibrium) p-value less than  $10^{-7}$ , remove variants with MAF<0.1% and to keep only those variants in the HRC reference panel. This resulted in a dataset with 11,734,353 SNPs.

We used two separate datasets for replicating the associated variants found in this study. The first set of 930 samples were a subset of the 1,279 samples with imaging data that we did not use for the main GWAS, which had been primarily excluded due to not being in the recent British ancestry subset. An examination of these samples according the genetic principal components (PCs) revealed that many of those samples are mostly of European ancestry (**Supplementary Figure 20**). We selected 930 samples with a 1<sup>st</sup> genetic PC < 14 from **Supplementary Figure 20** and these constituted the replication sample. In January 2018 a further tranche of 4,588 samples with imaging data was released by UK Biobank. Of these subjects, we selected 3,956 subjects that both had genetic data available and also were imaged in the same imaging center as the discovery sample. We applied the same pre-processing pipeline as for the discovery set. We then restricted this to 3,456 subjects that were of recent British ancestry and replication tests were then conducted on these 3,456 subjects.

#### Potential Confounds for brain IDP GWAS

There are a number of potential confounding variables when carrying out GWAS of brain IDPs. We used three sets of covariates in our analyses relating to (a) imaging confounds (b) measures of genetic ancestry, and (c) non-brain imaging body measures.

We identified a set of variables likely to represent imaging confounds, for example those being associated with biases in noise or signal level, corruption of data by head motion or overall head size changes. For many of these we generated various versions

(for example, using quantile normalization and also outlier removal, to generate two versions of a given variable, as well as including the squares of these to help model nonlinear effects of the potential confounds). This was done in order to generate a rich set of covariates and hence reduce as much as possible potential confounding effects on analyses such as the GWAS, which are particularly of concern when the subject numbers are so high.<sup>4,81</sup>

Age and sex are can be variables of biological interest, but can also be sources of imaging confounds, and here were included in the confound regressors. Head motion is summarized from the rfMRI and tfMRI as the mean displacement (in mm) between one timepoint and the next, averaged over all timepoints and across the brain. Head motion can be a confounding factor for all modalities and not just those comprising timeseries of volumes, but is only readily estimable from the timeseries modalities. Nevertheless, the amount of head motion is expected to be reasonably similar across all modalities (e.g., correlation between head motion in resting and task fMRI is  $r=0.52$ ) and so it is worth using fMRI-derived head motion estimates as confound regressors for all modalities.

The exact location of the head and the radio-frequency receive coil in the scanner can affect data quality and IDPs. To help account for variations in position in different scanned participants, several variables have been generated that describe aspects of the positioning (see **URLs**). The intention is that these can be useful as “confound variables”, for example these might be regressed out of brain IDPs before carrying out correlations between IDPs and non-imaging variables. TablePosition is the Z-position of the coil (and the scanner table that the coil sits on) within the scanner (the Z axis points down the centre of the magnet). BrainCoGZ is somewhat similar, being the Z-position of the centre of the brain within the scanner (derived from the brain mask estimated from the T1-weighted structural image). BrainCoGX is the X-position (left-right) of the centre of the brain mask within the scanner. BrainBackY is the Y-position (front-back relative to the head) of the back of brain mask within the scanner.

UK Biobank brain imaging aims to maintain as fixed an acquisition protocol as possible during the 5-6 years that the scanning of 100,000 participants will take. There have been a number of minor software upgrades (the imaging study seeks to

minimise any major hardware or software changes). Detailed descriptions of every protocol change, along with thorough investigations of the effects of these on the resulting data, will be the subject of a future paper. Here, we attempted to model any long-term (over scan date) changes or drifts in the imaging protocol or software or hardware performance, by generating a number of data-driven confounds. The first step was to form a temporary working version of the full subjects  $\times$  IDPs matrix with outliers limited (see below) and no missing data, using a variant of low-rank matrix imputation with soft thresholding on the eigenvalues<sup>82</sup>. Next, the data is temporally regularized (approximate scale factor of several months with respect to scan date) with spline-based smoothing. We then applied PCA and kept the top 10 components kept, to generate a basis set reflecting the primary modes of slowly-changing drifts in the data.

To describe the full set of imaging confounds we use a notation where subscripts “i” indicate quantile normalization of variables, and “m” to indicate median-based outlier removal (discarding values greater than 5 times the median-absolute-deviation from the overall median). If no subscript is included, no normalization or outlier removal was carried out. Certain combinations of normalization and powers were not included, either because of very high redundancy with existing combinations, or because a particular combination was not well-behaved. The full set of variables used to create the confounds matrix are:

- a = age at time of scanning, demeaned (cross-subject mean subtracted)
- s = sex, demeaned
- q = 4 confounds relating to the position of the radio-frequency coil and the head in the scanner (see above), all demeaned
- d = 10 drift confounds (see above)
- m = 2 measures of head motion (one from rfMRI, one from tfMRI)
- h = volumetric scaling factor needed to normalise for head size<sup>83</sup>

The full matrix of imaging confounds is then:

$$[ a \ a^2 \ a \times s \ a^2 \times s \ a_i \ a_i^2 \ a_i \times s \ a_i^2 \times s \ m_m \ m_m^2 \ h_m \ q_m \ q_m^2 \ d_m \ m_i \ h_i \ q_i \ q_i^2 \ d_i ]$$

Any missing values in this matrix are set to zero after all columns have had their mean subtracted. This results in a full-rank matrix of 53 columns (ratio of maximum

645 to minimum eigenvalues = 42.6). For additional discussion on the dangers and  
646 interpretation of imaging confounds in big imaging data studies, particularly in the  
647 context of disease studies, see <sup>81</sup>.

648

649 Genetic ancestry is a well-known potential confound in GWAS. We ameliorated this  
650 by filtering out samples that were not of recent British ancestry. However, a set of 40  
651 genetic principal components (PCs) has been provided by UK Biobank<sup>6</sup> and we used  
652 these PCs as covariates in all of our analysis. The matrix of imaging confounds,  
653 together with a matrix of 40 genetic principal components, was regressed out of each  
654 IDP before the analyses reported here.

655

656 There exist a number of substantial correlations between IDPs and non-genetic  
657 variables collected on the UK Biobank subjects<sup>4</sup>. Based on this, we also carried out  
658 some analyses involving variables relating to Blood Pressure (Diastolic and Systolic),  
659 Height, Weight, Head Bone Mineral Density, Head Bone Mineral Content and 2  
660 principal components from the broader set of bone mineral variables available (see  
661 **URLs**). **Supplementary Figure 21** shows the association of these 8 variables against  
662 the IDPs and shows significant associations. These are variables that likely have a  
663 genetic basis, at least in part. Genetic variants associated with these variables might  
664 then produce false positive associations for IDPs. To investigate this, we ran GWAS  
665 for these 8 traits (conditioned on the imaging confounds and genetic PCs)  
666 (**Supplementary Figures 22**). We also ran a parallel set of IDP GWAS with these  
667 “body confounds” regressed out of the IDPs.

668

# 669 Heritability and genetic correlation of IDPs

670

671 We used a linear mixed model implemented in the SBAT (Sparse Bayesian  
672 Association Test) software (see **URLs**) to calculate additive genetic heritabilities for  
673 the  $P=3,144$  traits. To estimate genetic correlations we used a multi-trait mixed  
674 model. If  $Y$  is an  $N \times P$  matrix of  $P$  phenotypes (columns) measured on  $N$  individuals  
675 (rows) then we use the model

$$676 \quad Y = U + \varepsilon \quad (1)$$

677 where  $U$  is an  $N \times P$  matrix of random effects and  $\varepsilon$  is a  $N \times P$  matrix of residuals and  
678 these are modelled using Matrix normal distributions as follows

679

$$U \sim MN(0, K, B)$$

680

$$\varepsilon \sim MN(0, I_N, E)$$

681 In this model  $K$  is the  $N \times N$  kinship matrix between individuals,  $B$  is the  $P \times P$  matrix  
 682 of genetic covariances between phenotypes and  $E$  is the  $P \times P$  matrix of residual  
 683 covariances between phenotypes. We estimate the covariance matrices  $B$  and  $E$  using  
 684 a new C++ implementation of an EM algorithm<sup>84</sup> included in the SBAT software (see  
 685 **URLs**).

686

687 For the marginal heritabilities and genetic correlation analysis we used a realised  
 688 relationship matrix (RRM) for the Kinship matrix ( $K$ ). This RRM was calculated from  
 689 the 8,428 nominally unrelated individuals using fastLMM (see **URLs**). We used the  
 690 subset of imputed SNPs that were both assayed by the genotyping chips and included  
 691 in the HRC reference panel, and so will essentially be hard-called genotypes. In  
 692 addition, all SNPs with duplicate rsids were removed. PLINK (see **URLs**) was used  
 693 for file conversion before input into fastLMM.

694

695 To estimate genetic correlations, we fit the model to several of the groupings of IDPs  
 696 detailed in **Supplementary Table 12**. The estimated covariance matrices  $B$  and  $E$   
 697 were used to estimate the genetic correlation of pairs of IDPs. The genetic correlation  
 698 between the  $i$ th and  $j$ th IDPs in a jointly analyzed group of IDPs is estimated as

$$r_{ij} = \frac{B_{ij}}{\sqrt{B_{ii}B_{jj}}}$$

699

#### 700 Multi-trait association tests

701

702 We used a multi-trait mixed model to test each SNP for association with different  
 703 groupings of traits detailed in **Supplementary Table 7**. The model has the form

$$Y = G\alpha + U + \varepsilon$$

704 where  $G$  is an  $N \times 1$  vector of SNP dosages and  $\alpha$  is a  $1 \times P$  vector of effect sizes. We fit  
 705 the model using estimates of  $B$  and  $E$  from the “null” model with  $\alpha = 0$  and a leave  
 706 one chromosome out (LOCO) approach for RRM calculation. We ran this test on the  
 707 one chromosome out (LOCO) approach for RRM calculation. We ran this test on the  
 708 main set of 8,428 samples and on the replication samples. For the replication analysis

we used the estimates of  $B$  and  $E$  from the main set of 8,428 samples. This test is implemented in the SBAT software (see **URLs**).

### Genetic association of IDPs

We used BGENIE v1.2 (see **URLs**) to carry out GWAS of imputed variants against each of the processed IDPs. This program was designed to carry out the large number of IDP GWAS required in this analysis. It avoids repeated reading of the genetic data file for each IDP and uses efficient linear algebra libraries and threading to achieve good performance. The program has already been used by several studies to analyze genetic data from the UK Biobank<sup>85,86</sup>. We fit an additive model of association at each variant, using expected genotype count (dosage) from the imputed genetic data. We ran associated tests on the main set of 8,428 samples and the replication samples.

### Identifying associated genetic loci

Most GWAS only analyze one or a few different phenotypes, and often uncover just a handful of associated genetic loci, which can be interrogated in detail. Due to the large number of associations uncovered in this study we developed an automated method to identify, distinguish and count individual associated loci from the 3,144 GWAS (one GWAS for each IDP). For each GWAS we first identified all variants with a  $-\log_{10}$  p-value  $> 7.5$ . We applied an iterative process that starts by identifying the most strongly associated variant, storing it as a lead variant, and then removing it, and all variants within 0.25cM from the list of variants (equivalent to approximately 250kb in physical distance). The process was then repeated until the list of variants was empty. We applied this process to each GWAS using 2 different filters on MAF: (a)  $MAF > 0.1\%$ , and (b)  $MAF > 1\%$ . We grouped associated lead SNPs across phenotypes into clusters. This process first grouped SNPs within 0.25cM of each other, and this mostly produced sensible clusters, but some hand curation was used to merge or split clusters based on visual inspection of cluster plots and levels of LD between SNPs. For some clusters in **Table 1** we report coding SNPs that were found to be in high LD with the lead SNPs.

### Accounting for multiple IDPs



743

744 We adjusted the genome-wide significance threshold ( $-\log_{10} p\text{-value} > 7.5$ ) by a  
745 Bonferroni factor ( $-\log_{10}(3144)=3.5$ ) that accounts for the number of IDPs tested,  
746 giving a threshold of  $-\log_{10} p > 11$ . This assumes (incorrectly) that the IDPs are  
747 independent and so is likely to be conservative, but we preferred to be cautious when  
748 analyzing so many IDPs.

749

750

# 751 Genetic correlation analysis

752

753 We used LD score regression<sup>87</sup> to estimate the genetic correlation between the IDPs  
754 studied in our analysis and 10 disease, personality or brain related traits. We gathered  
755 summary statistics for genome wide association studies of the neuroticism personality  
756 trait, autism spectrum and sleep duration and also 7 disease traits: attention deficit  
757 hyperactivity disorder, bipolar disorder, Alzheimer's disease, major depressive  
758 disorder, schizophrenia, stroke and amyotrophic lateral sclerosis. The number of  
759 samples in each of these studies and the DOIs for the corresponding studies are  
760 provided in **Supplementary Table 13**.

761

762 For each IDP/trait pair, we used the LDSCORE regression software (v1.0.0) to  
763 compute the genetic correlation between the IDP and the trait, with linkage  
764 disequilibrium measurements taken from 1000 Genomes Project (provided by the  
765 maintainers of the LDSCORE regression software). We filtered the SNPs to include  
766 only those with imputation INFO  $\geq 0.9$  and MAF  $\geq 0.1\%$ . Only INFO scores for  
767 major depressive disorder, schizophrenia and attention deficit hyperactivity disorder  
768 were provided by the source studies, and so for these three analyses we applied the  
769 INFO threshold to both the SNPs from our study and also the source study. For the  
770 remaining 6 studies, an INFO filter was applied to the SNPs from our own study. Due  
771 to low levels of heritability of the functional edge IDPs, all of these were removed  
772 from this analysis. Since calculation of genetic correlation between traits only really  
773 makes sense if both traits are themselves heritable, we only used those IDPs with z-  
774 scores for significantly non-zero heritability greater than 4. In total we used 897 IDPs.  
775 To account for correlations between IDPs we used the raw phenotype correlation

matrix to simulate z-scores (and associated tail probabilities) using samples from a multivariate normal distribution with that same correlation matrix.

# Analysis of enrichment of functional categories

We used the LDSCORE regression software to carry out the heritability enrichment partitioning analysis into different functional categories (see **URLs**). We used 24 functional categories: coding, UTR, promoter, intron, histone marks H3K4me1, H3K4me3, H3K9ac5 and two versions of H3K27ac, open chromatin DNase I hypersensitivity Site (DHS) regions, combined chromHMM/ Segway predictions, regions conserved in mammals, super-enhancers and active enhancers from the FANTOM5 panel of samples. For each IDP, the enrichment of each functional category is summarized as the proportion of  $h^2$  explained by the category divided by the proportion of common variants in the category. For each IDP and each annotation we used the two-side enrichment p-value as reported by the LDSCORE regression software. We labeled those p-values as *enriched* or *depleted* depending on whether the enrichment estimate was greater or less than 1. We stratified these p-values accordingly into 23 groups of IDPs.

# References

1. *Brain Mapping : An Encyclopedic Reference*. (Elsevier, 2015).
2. Sudlow, C. *et al*. UK Biobank: An Open Access Resource for Identifying the Causes of a Wide Range of Complex Diseases of Middle and Old Age. *PLOS Medicine* **12**, e1001779 (2015).
3. Allen, N. *et al*. UK Biobank: Current status and what it means for epidemiology. *Health Policy and Technology* **1**, 123–126 (2012).
4. Miller, K. L. *et al*. Multimodal population brain imaging in the UK Biobank prospective epidemiological study. *Nat. Neurosci.* **19**, 1523–1536 (2016).
5. Alfaro-Almagro, F. *et al*. Image processing and Quality Control for the first 10,000 brain imaging datasets from UK Biobank. *Neuroimage* **166**, 400–424 (2018).
6. Bycroft, C. *et al*. Genome-wide genetic data on ~500,000 UK Biobank participants. *bioRxiv* 1–36 (2017). doi:10.1101/166298
7. Hibar, D. P. *et al*. Common genetic variants influence human subcortical brain structures. *Nature* **520**, 224–229 (2015).
8. Hibar, D. P. *et al*. Novel genetic loci associated with hippocampal

- 813 volume. *Nature Communications* **8**, 13624 (2017).
- 814 9. Shen, L. *et al.* Whole genome association study of brain-wide imaging  
815 phenotypes for identifying quantitative trait loci in MCI and AD: A study  
816 of the ADNI cohort. *Neuroimage* **53**, 1051–1063 (2010).
- 817 10. Koran, M. E. *et al.* Impact of family structure and common environment  
818 on heritability estimation for neuroimaging genetics studies using  
819 Sequential Oligogenic Linkage Analysis Routines. *JMIOBU* **1**, 014005  
820 (2014).
- 821 11. Colclough, G. L. *et al.* The heritability of multi-modal connectivity in  
822 human brain activity. *Elife* **6**, e20178 (2017).
- 823 12. Roalf, D. R. *et al.* Heritability of subcortical and limbic brain volume and  
824 shape in multiplex-multigenerational families with schizophrenia. *Biol.*  
825 *Psychiatry* **77**, 137–146 (2015).
- 826 13. Braber, den, A. *et al.* Heritability of subcortical brain measures: a  
827 perspective for future genome-wide association studies. *Neuroimage*  
828 **83**, 98–102 (2013).
- 829 14. Kremen, W. S. *et al.* Genetic and environmental influences on the size  
830 of specific brain regions in midlife: the VETSA MRI study. *Neuroimage*  
831 **49**, 1213–1223 (2010).
- 832 15. Yang, J. *et al.* Genetic variance estimation with imputed variants finds  
833 negligible missing heritability for human height and body mass index.  
834 *Nat. Genet.* **47**, 1114–1120 (2015).
- 835 16. Zuk, O., Hechter, E., Sunyaev, S. R. & Lander, E. S. The mystery of  
836 missing heritability: Genetic interactions create phantom heritability.  
837 *Proc. Natl. Acad. Sci. U.S.A.* **109**, 1193–1198 (2012).
- 838 17. Purcell, S. Variance components models for gene-environment  
839 interaction in twin analysis. *Twin Res* **5**, 554–571 (2002).
- 840 18. Fornage, M. *et al.* Genome-wide association studies of cerebral white  
841 matter lesion burden: the CHARGE consortium. *Ann. Neurol.* **69**, 928–  
842 939 (2011).
- 843 19. Nature, G. C., Consortium, G. 2017. Genetic effects on gene expression  
844 across human tissues. *Nature* **550**, 204–213 (2017).
- 845 20. Duyn, J. MR susceptibility imaging. *J. Magn. Reson.* **229**, 198–207  
846 (2013).
- 847 21. Dusi, S. *et al.* Exome sequence reveals mutations in CoA synthase as a  
848 cause of neurodegeneration with brain iron accumulation. *Am. J. Hum.*  
849 *Genet.* **94**, 11–22 (2014).
- 850 22. Wheeler, E. *et al.* Impact of common genetic determinants of  
851 Hemoglobin A1c on type 2 diabetes risk and diagnosis in ancestrally  
852 diverse populations: A transethnic genome-wide meta-analysis. *PLOS*  
853 *Medicine* **14**, e1002383 (2017).
- 854 23. Benyamin, B. *et al.* Novel loci affecting iron homeostasis and their  
855 effects in individuals at risk for hemochromatosis. *Nature*  
856 *Communications* **5**, 4926 (2014).
- 857 24. Consortium, G. L. G. *et al.* Discovery and refinement of loci associated  
858 with lipid levels. *Nat. Genet.* **45**, 1274–1283 (2013).
- 859 25. Vul, E., Harris, C., Winkielman, P. & Pashler, H. Puzzlingly High  
860 Correlations in fMRI Studies of Emotion, Personality, and Social  
861 Cognition. *Perspectives on Psychological Science* **4**, 274–290 (2009).
- 862 26. Savage, J. E. *et al.* GWAS meta-analysis (N=279,930) identifies new

- 863 genes and functional links to intelligence. *bioRxiv* 1–36 (2017).
- 864 doi:10.1101/184853
- 865 27. Goes, F. S. *et al.* Genome-wide association study of schizophrenia in
- 866 Ashkenazi Jews. *Am. J. Med. Genet. B Neuropsychiatr. Genet.* **168**,
- 867 649–659 (2015).
- 868 28. International Consortium for Blood Pressure Genome-Wide Association
- 869 Studies *et al.* Genetic variants in novel pathways influence blood
- 870 pressure and cardiovascular disease risk. *Nature* **478**, 103–109 (2011).
- 871 29. Johansson, A. *et al.* Genome-wide association and Mendelian
- 872 randomization study of NT-proBNP in patients with acute coronary
- 873 syndrome. *Hum. Mol. Genet.* **25**, 1447–1456 (2016).
- 874 30. Duncan, J. The multiple-demand (MD) system of the primate brain:
- 875 mental programs for intelligent behaviour. *Trends Cogn. Sci. (Regul.*
- 876 *Ed.)* **14**, 172–179 (2010).
- 877 31. Dolan, R. J. *et al.* Dopaminergic modulation of impaired cognitive
- 878 activation in the anterior cingulate cortex in schizophrenia. *Nature* **378**,
- 879 180–182 (1995).
- 880 32. Critchley, H. D. *et al.* Human cingulate cortex and autonomic control:
- 881 converging neuroimaging and clinical evidence. *Brain* **126**, 2139–2152
- 882 (2003).
- 883 33. Dityatev, A., Schachner, M. & Sonderegger, P. The dual role of the
- 884 extracellular matrix in synaptic plasticity and homeostasis. *Nature*
- 885 *Reviews Neuroscience* **11**, 735–746 (2010).
- 886 34. Lau, L. W., Cua, R., Keough, M. B., Haylock-Jacobs, S. & Yong, V. W.
- 887 Pathophysiology of the brain extracellular matrix: a new target for
- 888 remyelination. *Nature Reviews Neuroscience* **14**, 722–729 (2013).
- 889 35. Sobel, R. A. & Ahmed, A. S. White Matter Extracellular Matrix
- 890 Chondroitin Sulfate/Dermatan Sulfate Proteoglycans in Multiple
- 891 Sclerosis. *J Neuropathol Exp Neurol* **60**, 1198–1207 (2001).
- 892 36. Shih, C.-H., Lacagnina, M., Leuer-Bisciotti, K. & Pröschel, C. Astroglial-
- 893 Derived Periostin Promotes Axonal Regeneration after Spinal Cord
- 894 Injury. *J. Neurosci.* **34**, 2438–2443 (2014).
- 895 37. Matarin, M. *et al.* A genome-wide genotyping study in patients with
- 896 ischaemic stroke: initial analysis and data release. *The Lancet*
- 897 *Neurology* **6**, 414–420 (2007).
- 898 38. Clark, J. A., Yeaman, E. J., Blizzard, C. A., Chuckowree, J. A. &
- 899 Dickson, T. C. A Case for Microtubule Vulnerability in Amyotrophic
- 900 Lateral Sclerosis: Altered Dynamics During Disease. *Frontiers in*
- 901 *Cellular Neuroscience* **10**, 2910 (2016).
- 902 39. Lewis, C. M. *et al.* Genome-Wide Association Study of Major Recurrent
- 903 Depression in the U.K. Population. *American Journal of Psychiatry* **167**,
- 904 949–957 (2010).
- 905 40. Scafidi, J. *et al.* Intranasal epidermal growth factor treatment rescues
- 906 neonatal brain injury. *Nature* **506**, 230–234 (2013).
- 907 41. Deak, K. L. *et al.* Analysis of ALDH1A2, CYP26A1, CYP26B1,
- 908 CRABP1, and CRABP2 in human neural tube defects suggests a
- 909 possible association with alleles in ALDH1A2. *Birth Defects Research*
- 910 *Part A: Clinical and Molecular Teratology* **73**, 868–875 (2005).
- 911 42. Jen, J. C. *et al.* Mutations in a Human ROBO Gene Disrupt Hindbrain
- 912 Axon Pathway Crossing and Morphogenesis. *Science* **304**, 1509–1513

- 913 (2004).
- 914 43. Douaud, G. *et al.* DTI measures in crossing-fibre areas: Increased  
915 diffusion anisotropy reveals early white matter alteration in MCI and mild  
916 Alzheimer's disease. *Neuroimage* **55**, 880–890 (2011).
- 917 44. Stefansson, H. *et al.* A common inversion under selection in Europeans.  
918 *Nat. Genet.* **37**, 129–137 (2005).
- 919 45. Kauwe, J. S. K. *et al.* Variation in MAPT is associated with  
920 cerebrospinal fluid tau levels in the presence of amyloid-beta  
921 deposition. *Proc. Natl. Acad. Sci. U.S.A.* **105**, 8050–8054 (2008).
- 922 46. Jun, G. *et al.* A novel Alzheimer disease locus located near the gene  
923 encoding tau protein. *Mol. Psychiatry* **21**, 108–117 (2016).
- 924 47. Baker, M. *et al.* Mutations in progranulin cause tau-negative  
925 frontotemporal dementia linked to chromosome 17. *Nature* **442**, 916–  
926 919 (2006).
- 927 48. Höglinger, G. U. *et al.* Identification of common variants influencing risk  
928 of the tauopathy progressive supranuclear palsy. *Nat. Genet.* **43**, 699–  
929 705 (2011).
- 930 49. Desikan, R. S. *et al.* Genetic overlap between Alzheimer's disease and  
931 Parkinson's disease at the MAPT locus. *Mol. Psychiatry* **20**, 1588–1595  
932 (2015).
- 933 50. Mutch, C. A. *et al.* Disorders of Microtubule Function in Neurons:  
934 Imaging Correlates. *American Journal of Neuroradiology* **37**, 528–535  
935 (2016).
- 936 51. Schizophrenia Working Group of the Psychiatric Genomics Consortium.  
937 Biological insights from 108 schizophrenia-associated genetic loci.  
938 *Nature* **511**, 421–427 (2014).
- 939 52. Haijma, S. V. *et al.* Brain volumes in schizophrenia: a meta-analysis in  
940 over 18 000 subjects. *Schizophr Bull* **39**, 1129–1138 (2013).
- 941 53. Low, S.-K. *et al.* Genome-wide association study for intracranial  
942 aneurysm in the Japanese population identifies three candidate  
943 susceptible loci and a functional genetic variant at EDNRA. *Hum. Mol.*  
944 *Genet.* **21**, 2102–2110 (2012).
- 945 54. Nandi, S. *et al.* The CSF-1 receptor ligands IL-34 and CSF-1 exhibit  
946 distinct developmental brain expression patterns and regulate neural  
947 progenitor cell maintenance and maturation. *Developmental Biology*  
948 **367**, 100–113 (2012).
- 949 55. Mizuno, T. *et al.* Interleukin-34 selectively enhances the neuroprotective  
950 effects of microglia to attenuate oligomeric amyloid- $\beta$  neurotoxicity. *Am.*  
951 *J. Pathol.* **179**, 2016–2027 (2011).
- 952 56. Nandar, W. & Connor, J. R. HFE gene variants affect iron in the brain.  
953 *J. Nutr.* **141**, 729S–739S (2011).
- 954 57. Leitner, D. F. & Connor, J. R. Functional roles of transferrin in the brain.  
955 *Biochimica et Biophysica Acta (BBA) - General Subjects* **1820**, 393–402  
956 (2012).
- 957 58. Gao, G. & Chang, Y.-Z. Mitochondrial ferritin in the regulation of brain  
958 iron homeostasis and neurodegenerative diseases. *Frontiers in*  
959 *Pharmacology* **5**, 19 (2014).
- 960 59. Middelberg, R. P. S. *et al.* Genetic variants in LPL, OASL and  
961 TOMM40/APOE-C1-C2-C4 genes are associated with multiple  
962 cardiovascular-related traits. *BMC Med. Genet.* **12**, 123 (2011).



- 963 60. Srinivasan, K. *et al.* Untangling the brain's neuroinflammatory and  
964 neurodegenerative transcriptional responses. *Nature Communications*  
965 **7**, 11295 (2016).
- 966 61. Scarr, E. *et al.* Increased cortical expression of the zinc transporter  
967 SLC39A12 suggests a breakdown in zinc cellular homeostasis as part  
968 of the pathophysiology of schizophrenia. *npj Schizophrenia* **2**,  
969 npjschz20162 (2016).
- 970 62. Pickrell, J. K. *et al.* Detection and interpretation of shared genetic  
971 influences on 42 human traits. *Nat. Genet.* (2016). doi:10.1038/ng.3570
- 972 63. Fujii, T. *et al.* Possible association of the semaphorin 3D gene  
973 (SEMA3D) with schizophrenia. *J Psychiatr Res* **45**, 47–53 (2011).
- 974 64. Panaccione, I. *et al.* Neurodevelopment in schizophrenia: the role of the  
975 wnt pathways. *Curr Neuropsychopharmacol* **11**, 535–558 (2013).
- 976 65. Anitha, A. *et al.* Genetic analyses of roundabout (ROBO) axon guidance  
977 receptors in autism. *Am. J. Med. Genet. B Neuropsychiatr. Genet.*  
978 **147B**, 1019–1027 (2008).
- 979 66. Iossifov, I. *et al.* De novo gene disruptions in children on the autistic  
980 spectrum. *Neuron* **74**, 285–299 (2012).
- 981 67. Aoki, Y., Abe, O., Nippashi, Y. & Yamasue, H. Comparison of white  
982 matter integrity between autism spectrum disorder subjects and typically  
983 developing individuals: a meta-analysis of diffusion tensor imaging  
984 tractography studies. *Mol Autism* **4**, 25 (2013).
- 985 68. Di, X., Azeez, A., Li, X., Haque, E. & Biswal, B. B. Disrupted focal white  
986 matter integrity in autism spectrum disorder: A voxel-based meta-  
987 analysis of diffusion tensor imaging studies. *Prog.*  
988 *Neuropsychopharmacol. Biol. Psychiatry* **82**, 242–248 (2018).
- 989 69. Douaud, G., Filippini, N., Knight, S., Talbot, K. & Turner, M. R.  
990 Integration of structural and functional magnetic resonance imaging in  
991 amyotrophic lateral sclerosis. *Brain* **134**, 3470–3479 (2011).
- 992 70. Meyer, S. *et al.* Voxel-based lesion-symptom mapping of stroke lesions  
993 underlying somatosensory deficits. *Neuroimage Clin* **10**, 257–266  
994 (2016).
- 995 71. Finucane, H. K. *et al.* Partitioning heritability by functional annotation  
996 using genome-wide association summary statistics. *Nat. Genet.* **47**,  
997 1228–1235 (2015).
- 998 72. Alfaro-Almagro, F. *et al.* Image Processing and Quality Control for the  
999 first 10,000 Brain Imaging Datasets from UK Biobank. *bioRxiv* 130385  
1000 (2017). doi:10.1101/130385
- 1001 73. Dale, A. M., Fischl, B. & Sereno, M. I. Cortical surface-based analysis. I.  
1002 Segmentation and surface reconstruction. *Neuroimage* **9**, 179–194  
1003 (1999).
- 1004 74. Fischl, B., Sereno, M. I. & Dale, A. M. Cortical surface-based analysis.  
1005 II: Inflation, flattening, and a surface-based coordinate system.  
1006 *Neuroimage* **9**, 195–207 (1999).
- 1007 75. Klein, A. & Tourville, J. 101 labeled brain images and a consistent  
1008 human cortical labeling protocol. *Front Neurosci* **6**, 171 (2012).
- 1009 76. Destrieux, C., Fischl, B., Dale, A. & Halgren, E. Automatic parcellation  
1010 of human cortical gyri and sulci using standard anatomical  
1011 nomenclature. *Neuroimage* **53**, 1–15 (2010).
- 1012 77. Hyvärinen, A. Fast and robust fixed-point algorithms for independent

- 1013 component analysis. *IEEE Trans Neural Netw* **10**, 626–634 (1999).
- 1014 78. Duff, E. P. *et al.* Learning to identify CNS drug action and efficacy using
- 1015 multistudy fMRI data. *Sci Transl Med* **7**, 274ra16–274ra16 (2015).
- 1016 79. McCarthy, S. *et al.* A reference panel of 64,976 haplotypes for genotype
- 1017 imputation. *bioRxiv* 035170 (2015). doi:10.1101/035170
- 1018 80. Marchini, J., Cardon, L. R., Phillips, M. S. & Donnelly, P. The effects of
- 1019 human population structure on large genetic association studies. *Nat.*
- 1020 *Genet.* **36**, 512–517 (2004).
- 1021 81. Smith, S. M. & Nichols, T. E. Statistical Challenges in ‘Big Data’ Human
- 1022 Neuroimaging. *Neuron* **97**, 263–268 (2018).
- 1023 82. Cai, J.-F., Candès, E. J. & Shen, Z. A Singular Value Thresholding
- 1024 Algorithm for Matrix Completion. *SIAM Journal on Optimization* **20**,
- 1025 1956–1982 (2010).
- 1026 83. Smith, S. M. *et al.* Accurate, robust, and automated longitudinal and
- 1027 cross-sectional brain change analysis. *Neuroimage* **17**, 479–489 (2002).
- 1028 84. Dahl, A. *et al.* A multiple-phenotype imputation method for genetic
- 1029 studies. *Nat. Genet.* 1–9 (2016). doi:10.1038/ng.3513
- 1030 85. Luciano, M. *et al.* 116 independent genetic variants influence the
- 1031 neuroticism personality trait in over 329,000 UK Biobank individuals. 1–
- 1032 32 (2017). doi:10.1101/168906
- 1033 86. Davies, G. *et al.* Ninety-nine independent genetic loci influencing
- 1034 general cognitive function include genes associated with brain health
- 1035 and structure (N = 280,360). *bioRxiv* 1–35 (2017). doi:10.1101/176511
- 1036 87. Bulik-Sullivan, B. *et al.* An atlas of genetic correlations across human
- 1037 diseases and traits. *Nat. Genet.* **47**, 1236–1241 (2015).
- 1038 88. Zhang, H., Schneider, T., Wheeler-Kingshott, C. A. & Alexander, D. C.
- 1039 NODDI: Practical in vivo neurite orientation dispersion and density
- 1040 imaging of the human brain. *Neuroimage* **61**, 1000–1016 (2012).

1041  
1042  
1043  
1044  
1045  
1046  
1047  
1048  
1049  
1050  
1051  
1052

## Acknowledgements

1053 The data used in this work was obtained from UK Biobank under Data Access  
1054 Application 8107. We are grateful to UK Biobank for making the resource data  
1055 available, and are extremely grateful to all UK Biobank study participants, who  
1056 generously donated their time to make this resource possible. F.A-A acknowledges  
1057 funding from the UK Medical Research Council and the Wellcome Trust via UK  
1058 Biobank. K.L.M. and S.M.S. receive further support from the Wellcome Trust. JM  
1059 acknowledges funding for this work from the European Research Council (ERC;



grant 617306) and the Leverhulme Trust. GD acknowledges funding from the Medical Research Council UK (MR/K006673/1). We are grateful to: Bruce Fischl, Doug Greve and Matt Glasser for advice on FreeSurfer processing; Jon Diprose and Robert Esnouf for their advice and support with high performance computing; Stuart McRobert for help setting up and configuring the Oxford Brain Imaging Genetics browser; Tom Nichols and Anderson Winkler for discussions about the imaging confounds. For the genetic correlation analysis we used summary statistic data from several GWAS of brain related conditions as follows: the ISGC Cerebrovascular Disease Knowledge Portal, International Genomics of Alzheimer's Project (IGAP), the Project MinE GWAS Consortium, the Social Science Genetic Association Consortium (SSGAC), the University of Exeter research group on Type 2 Diabetes, Obesity, Growth & Reproductive Ageing Genetics, the Psychiatric Genomics Consortium (PGC) and the ENIGMA consortium. We are grateful to these groups for making this data publicly available and to all the participants in these various studies.

#### **Author contributions**

J.M and S.S conceived and supervised the work. F.A-A, K.M, G.D., S.S created the IDPs and confound covariates. L.E, K.S, S.Shi and J.M carried out the genetic association, heritability, genetic correlation and functional enrichment analysis and created the Oxford BIG browser. J.M, S.S, G.D, F.A-A, K.M, K.S and L.E interpreted the results and wrote the paper.

#### **Conflicts of interest**

J.M is a co-founder and director of GENSCI Ltd. S.S is a co-founder of SBGneuro.

#### **URLs**

Oxford BIG server <http://big.stats.ox.ac.uk/>  
 BGENIE <https://jmarchini.org/bgenie/>  
 SBAT <https://jmarchini.org/sbat/>  
 fastLMM <https://github.com/MicrosoftGenomics/FaST-LMM>  
 PLINK <http://www.cog-genomics.org/plink/2.0/>  
 LDSCORE regression software <https://github.com/bulik/ldsc>  
 PheWeb <https://github.com/statgen/pheweb/>

1094  
1095 Various resources relating to the brain imaging in UK Biobank, including 3D-maps  
1096 and connectome browsers for the group-ICA rfMRI analyses, and matlab code used to  
1097 generate and apply the confound variables for this paper:  
1098 <http://www.fmrib.ox.ac.uk/ukbiobank/>  
1099  
1100 UK Biobank showcase variables used for head positioning confounds and scan date:  
1101 <http://biobank.ctsu.ox.ac.uk/showcase/field.cgi?id=25756>  
1102 <http://biobank.ctsu.ox.ac.uk/showcase/field.cgi?id=25757>  
1103 <http://biobank.ctsu.ox.ac.uk/showcase/field.cgi?id=25758>  
1104 <http://biobank.ctsu.ox.ac.uk/showcase/field.cgi?id=25759>  
1105 <https://biobank.ctsu.ox.ac.uk/showcase/field.cgi?id=53>  
1106  
1107 Head bone density and mineral content measures:  
1108 [https://biobank.ctsu.ox.ac.uk/crystal/docs/DXA\\_explan\\_doc.pdf](https://biobank.ctsu.ox.ac.uk/crystal/docs/DXA_explan_doc.pdf)  
1109  
1110 GWAS summary statistics used for genetic correlation analysis  
1111  
1112 Major depressive disorder - <https://www.med.unc.edu/pgc/>  
1113 Schizophrenia - <https://www.med.unc.edu/pgc/>  
1114 Autism spectrum - <https://www.med.unc.edu/pgc/>  
1115 Attention deficit hyperactivity disorder and bipolar disorder -  
1116 <https://www.med.unc.edu/pgc/>  
1117 Alzheimer's disease - [http://web.pasteur-](http://web.pasteur-lille.fr/en/recherche/u744/igap/igap_download.php)  
1118 [lille.fr/en/recherche/u744/igap/igap\\_download.php](http://web.pasteur-lille.fr/en/recherche/u744/igap/igap_download.php)  
1119 Amyotrophic lateral sclerosis - <http://databrowser.projectmine.com/>  
1120 Stroke - PMC4818561 from <http://cerebrovascularportal.org/informational/downloads>  
1121 Neuroticism - <https://www.thessgac.org/data>  
1122 Sleep duration - <http://www.t2diabetesgenes.org/data/>  
1123  
1124 ENIGMA - <http://enigma.ini.usc.edu/research/download-enigma-gwas-results/>  
1125  
1126 **Figure Captions**  
1127

1128 **Figure 1: Estimated heritability of IDPs.** Estimated heritability (y-axis) of all of the  
1129 IDPs analyzed. IDPs have been split into three broad groups : Structural MRI (top),  
1130 Diffusion MRI (middle) and Functional MRI (bottom). Points are colored according  
1131 to IDP groups. Circles and inverted triangles are used to identify IDPs that do/do not  
1132 have heritability significantly different from 0 at the 5% significance level. The mean  
1133 95% confidence interval (CI) is also indicated to the right of each group of IDPs.

1134  
1135 **Figure 2: Manhattan plot and spatial mapping of the associations between T2\* in**  
1136 **the putamen and 4 SNPs.** The Manhattan plot relates to the original GWAS for the  
1137 IDP T2\* in the bilateral putamen. The spatial maps show that the 4 SNPs most  
1138 strongly associated with T2\* in the putamen have distinct voxelwise patterns of effect  
1139 across the whole brain: rs4428180 (*TF*) effect is found in the dorsal putamen and  
1140 body of the caudate nucleus, but also in the right subthalamic nucleus and substantia  
1141 nigra, the red nucleus, lateral geniculate nucleus of the thalamus and the dentate  
1142 nucleus; rs144861591 (*HFE*) in the dorsal striatum, subthalamic nucleus, dentate  
1143 nucleus and Crus I/II of the cerebellum; rs10430578 (*ZIP12*) in the whole dorsal  
1144 striatum and pallidum; and rs668799 (*COASY*) in the whole dorsal striatum,  
1145 subgenual cingulate cortex and entorhinal cortex. The standard MNI152 T1 image is  
1146 used as background for the spatial maps (left is right). All group difference images  
1147 (color overlays) are thresholded at a T2\* difference of 0.6ms.

1148  
1149 **Figure 3: Manhattan plot and spatial mapping of the associations between GM**  
1150 **volume and rs13107325 (*SLC39A8/ZIP8*).** The Manhattan plot relates to the original  
1151 GWAS for the IDP of GM volume in the left ventral striatum. The images show  
1152 spatial mapping of rs13107325 against voxelwise local grey matter volume (GM was  
1153 averaged across all 1,181 subjects with 1 copy of the non-reference allele, and the  
1154 average from all 7,215 subjects having 0 copies was subtracted from that, for display  
1155 in color here; the difference was thresholded at 0.015 - unitless relative measure of  
1156 local grey matter volume). The maps show that the rs13107325 (*SLC39A8/ZIP8*)  
1157 effect is found more generally bilaterally in the ventral caudate, putamen, ventral  
1158 striatum, anterior cingulate cortex, and with a strong cerebellar contribution (lobules  
1159 VI-X), particularly in the prefrontal-projecting Crus I/II, which are selectively  
1160 expanded in humans.

1161

**Figure 4: Manhattan plot, spatial mapping and PheWAS plot relating to the association between the dMRI intra-cellular volume fraction (ICVF) measure and rs67827860 (VCAN).** **a)** The Manhattan plot relates to the original IDP GWAS with the strongest association (ICVF in the right inferior longitudinal fasciculus using tractography, associated with rs67827860). The ICVF parameter, estimated from the NODDI modelling<sup>88</sup>, aims to quantify predominantly intra-axonal water in white matter, by estimating where water diffusion is restricted. **b)** Spatial mapping of rs67827860 against voxelwise ICVF in white matter (ICVF was averaged across all 4,957 subjects with 0 copies of the non-reference allele, and the average from all 2,304 subjects having 1 copy was subtracted from that, for display in color here; the difference was thresholded at 0.005 – unitless fractional measure). Unlike the previous examples of (spatially) very focal effects in T2\* and grey matter volume in **Figures 2 and 3**, the effects of this SNP are extremely widespread across most of the white matter tracts (associated with 45 out of the 199 IDPs in cluster 11, **Supplementary Table 5**). **c)** The PheWAS plot for SNP rs67827860 shows the association ( $-\log_{10}$  p-value) on the y-axis for the SNP rs67827860 with each of the 3,144 IDPs. The IDPs are arranged on the x-axis in the three panels: (top) Structural MRI IDPs, (middle) Structural connectivity dMRI IDPs, (bottom) functional MRI IDPs. Points are coloured to delineate subgroups of IDPs and detailed in the legends. Summary details of SNP rs67827860 are given in the top right box. The grey line shows the Bonferroni multiple testing threshold of 4.79. In addition to the IDP of WM hyperintensities volume, there is a notable association with numerous dMRI IDPs (especially diffusion tensor-derived measures of FA, MO and 1<sup>st</sup>/2<sup>nd</sup>/3<sup>rd</sup> eigenvalues of the diffusion tensor, as well as additional ICVF measures).

**Figure 5: Manhattan plot and spatial mapping of the association between the dMRI tensor mode (MO) measure and SNP rs4935898 (ROBO3).** The Manhattan plot relates to the original GWAS for the IDP of MO in the crossing pontine tract associated with rs4935898. MO was averaged across all 6,807 subjects with ~0 copy of the non-reference allele, and the average from all 703 subjects having ~1 copy was subtracted from that, for display in red-yellow/blue-lightblue here, thresholded at 0.05 **(b,d)**. In **(b)** results are shown overlaid on the MNI152 T1 structural image; in contrast, background image in **(c, d)** is the UK Biobank average FA (fractional anisotropy) that shows clear tract structure within the brainstem. In **(c)** is

superimposed the orientation of the fibre tracts (in red, running along the x-axis). The spatial distribution (not shown) for the effects of rs2286184 (*SEMA3D*) on MO is almost identical to that of rs4935898, being again extremely spatially specific, with no extended effect elsewhere in the brain.

1200

**Figure 6: Partitioning of heritability by functional category.** The plot shows the proportion of IDPs in each of the 23 IDP groupings (x-axis) that show a nominal *enrichment* p-value < 0.05 for the 24 functional categories (y-axis). The total number of such IDPs for each category is given on the right edge of the plot. The number of IDPs in each IDP group is listed in brackets in the x-axis labels. The proportion of the genome annotated by each functional category is listed in brackets in the y-axis labels.

## Structural MRI

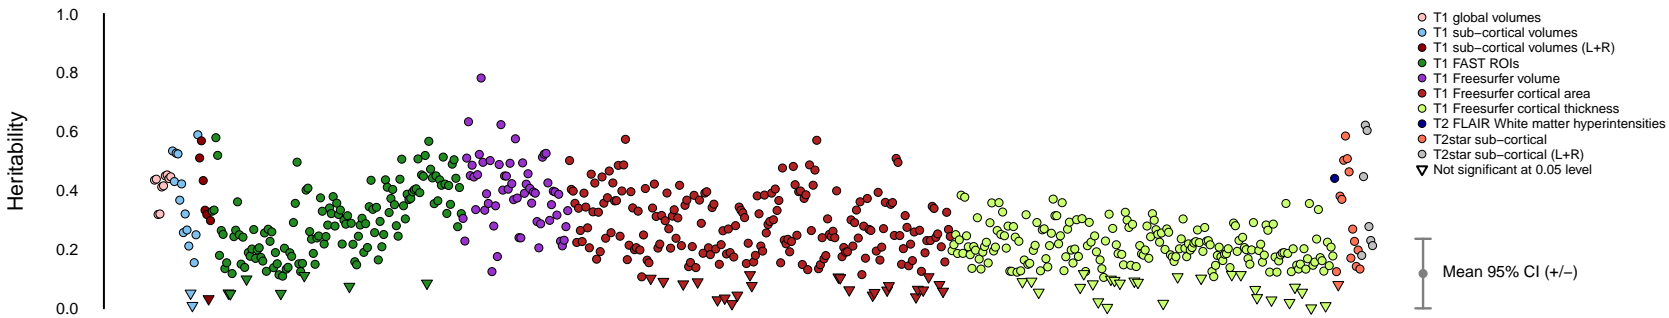

## Diffusion MRI

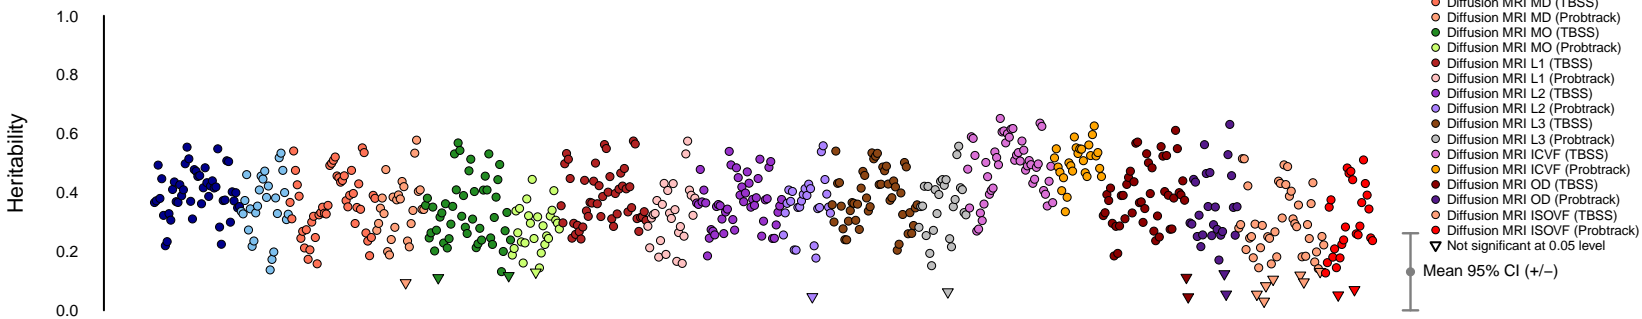

## Functional MRI

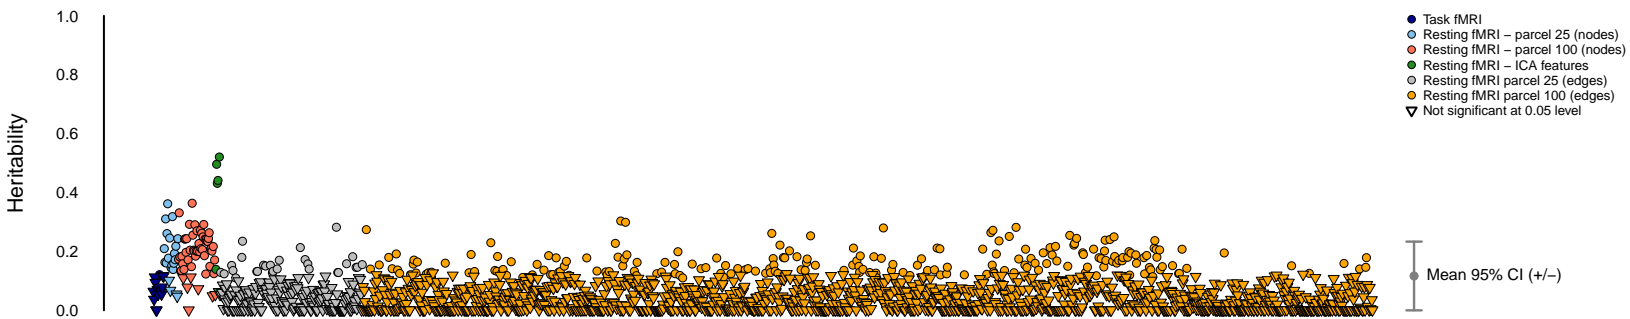



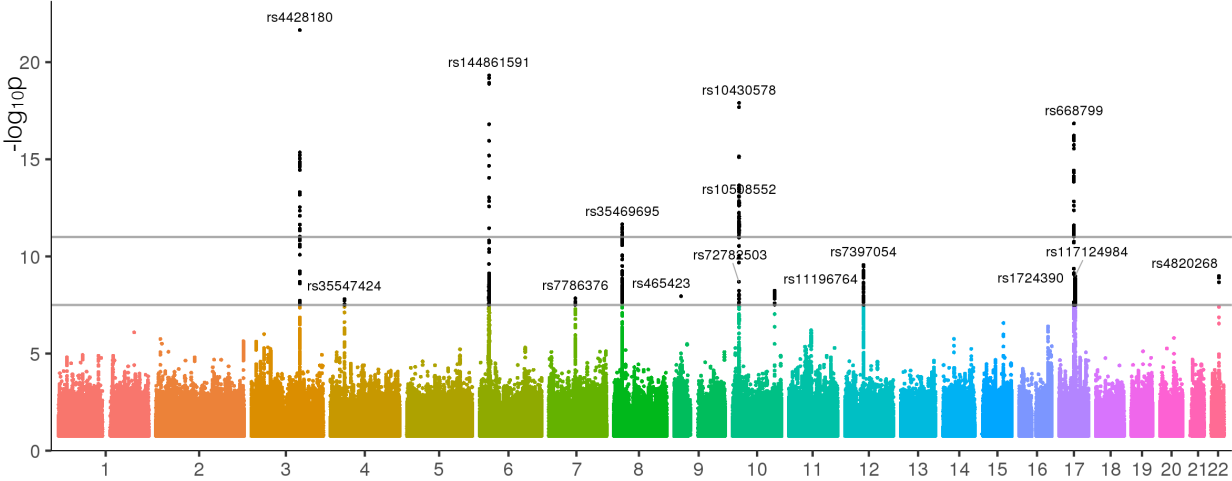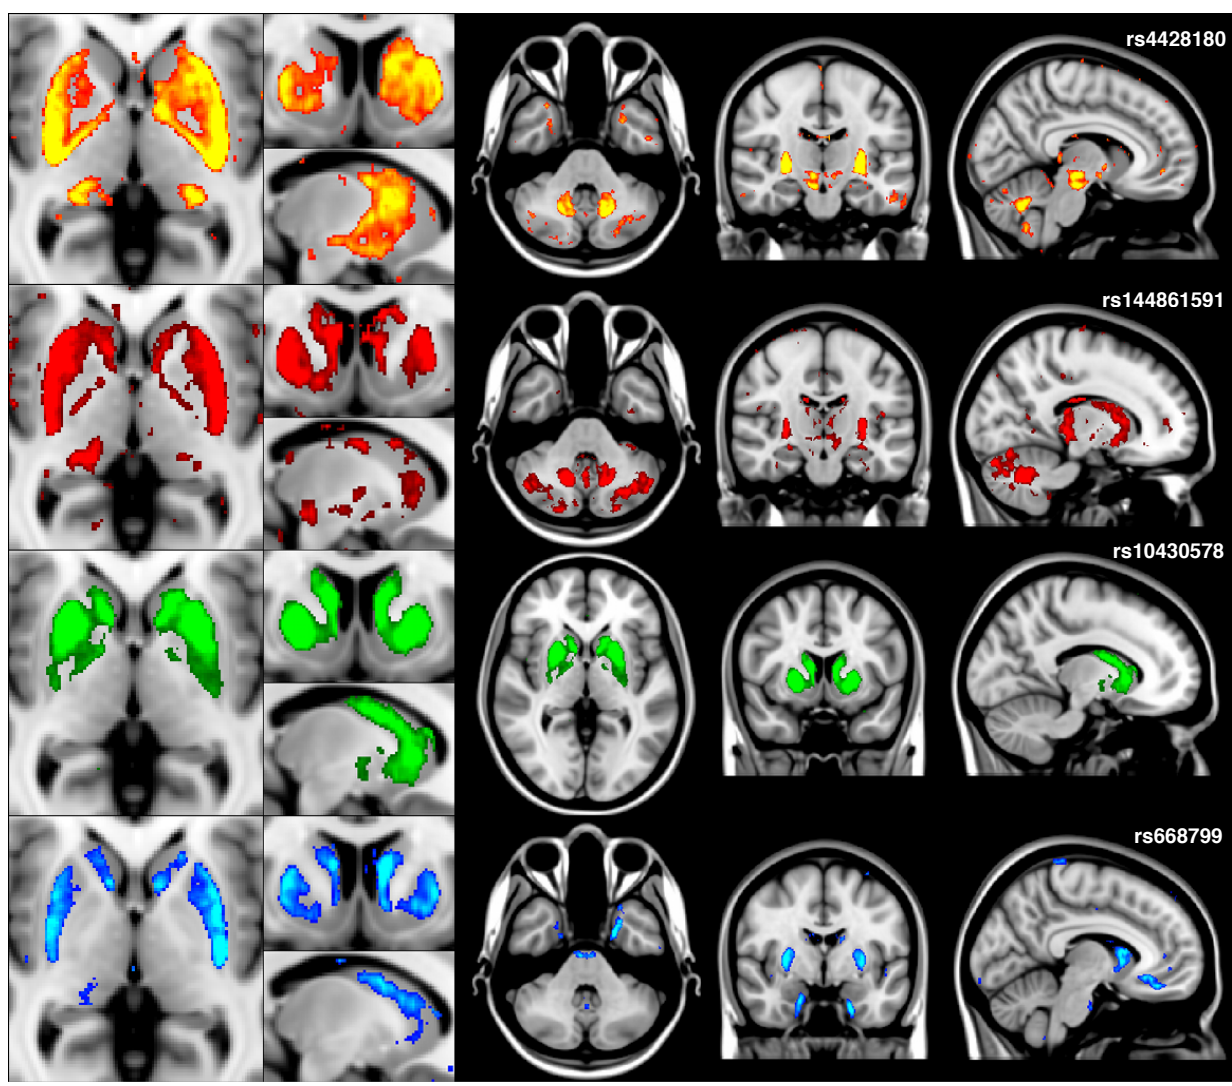



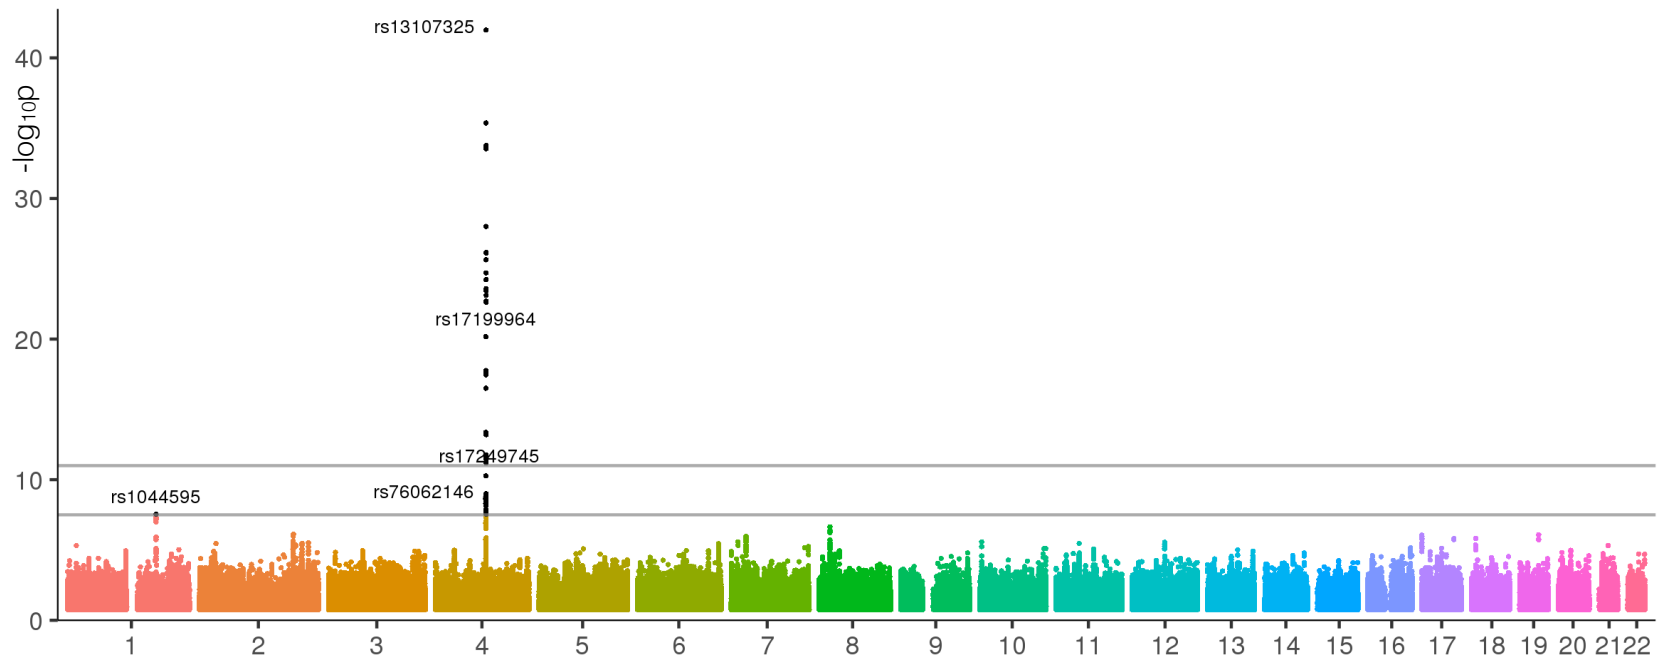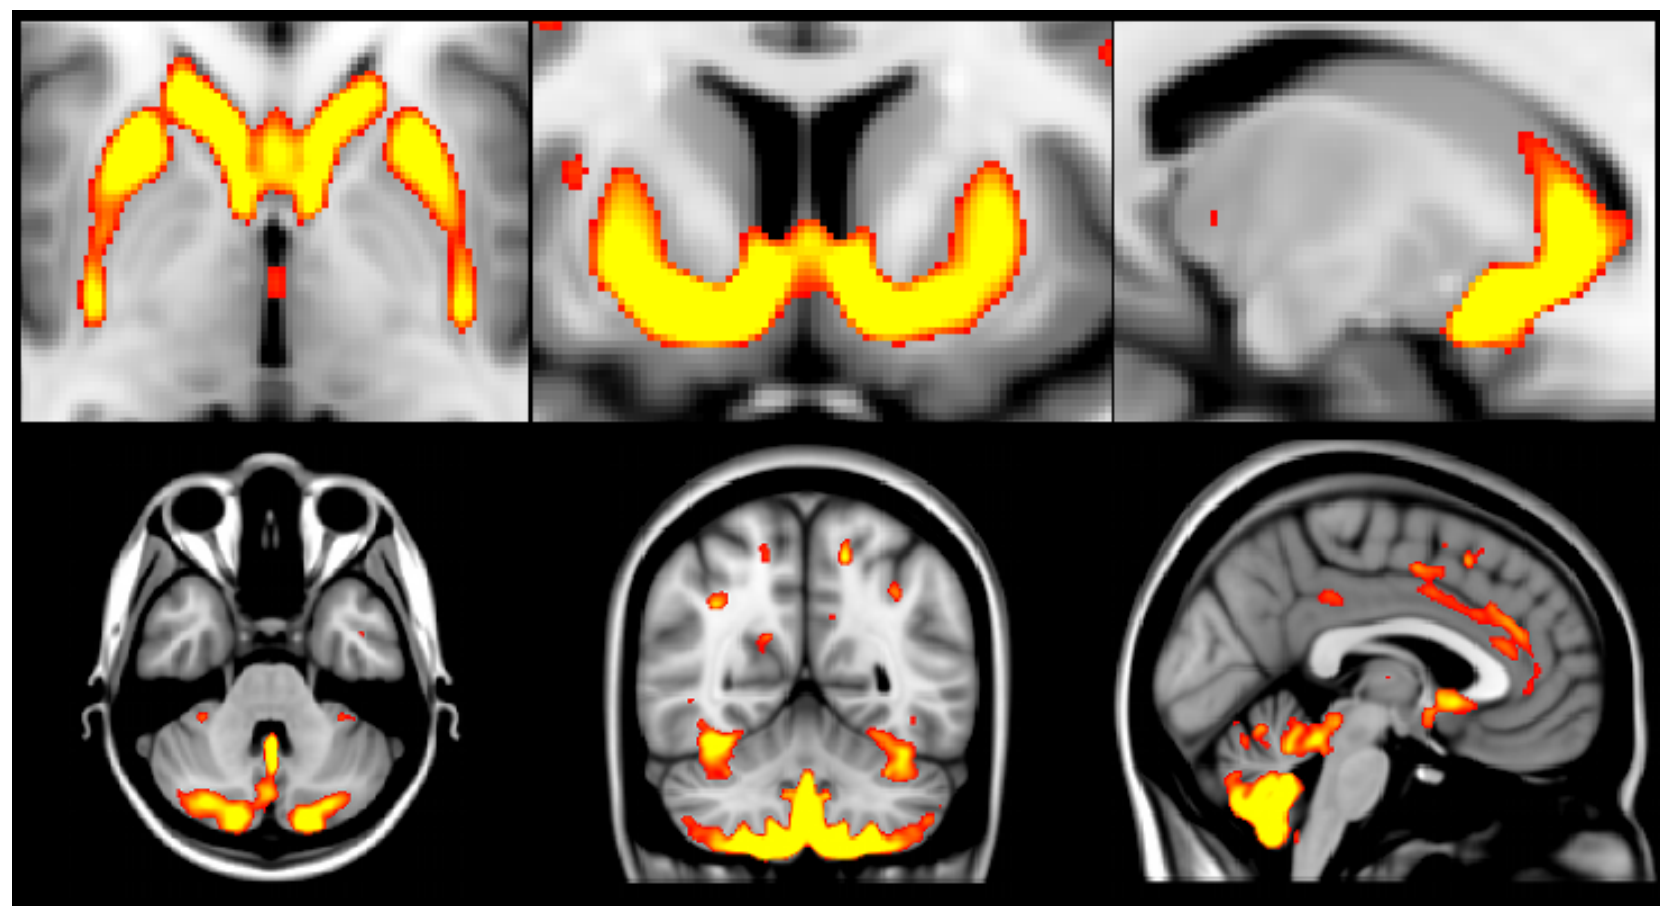

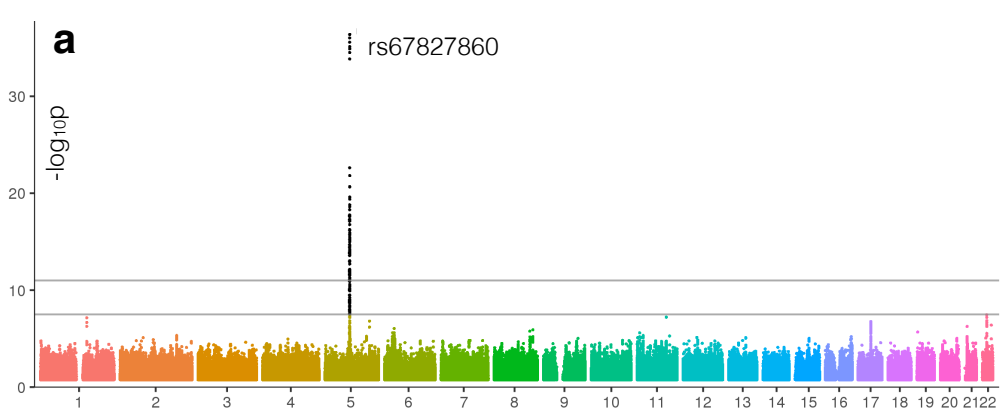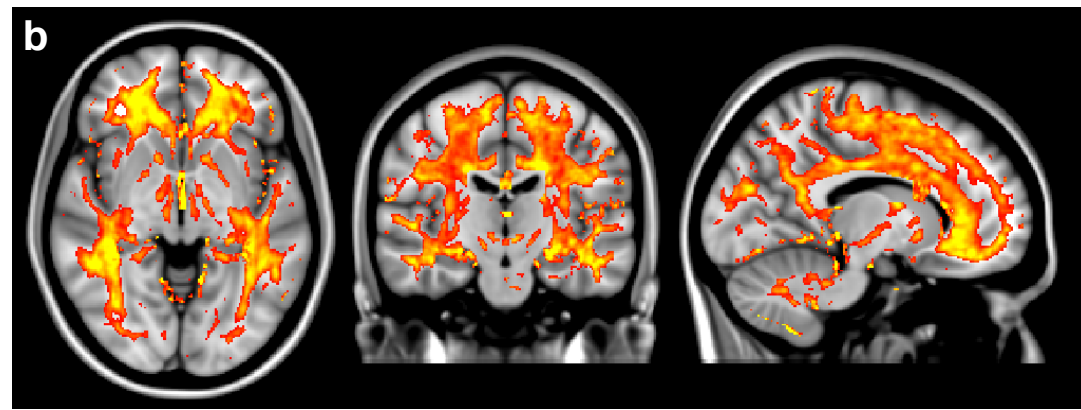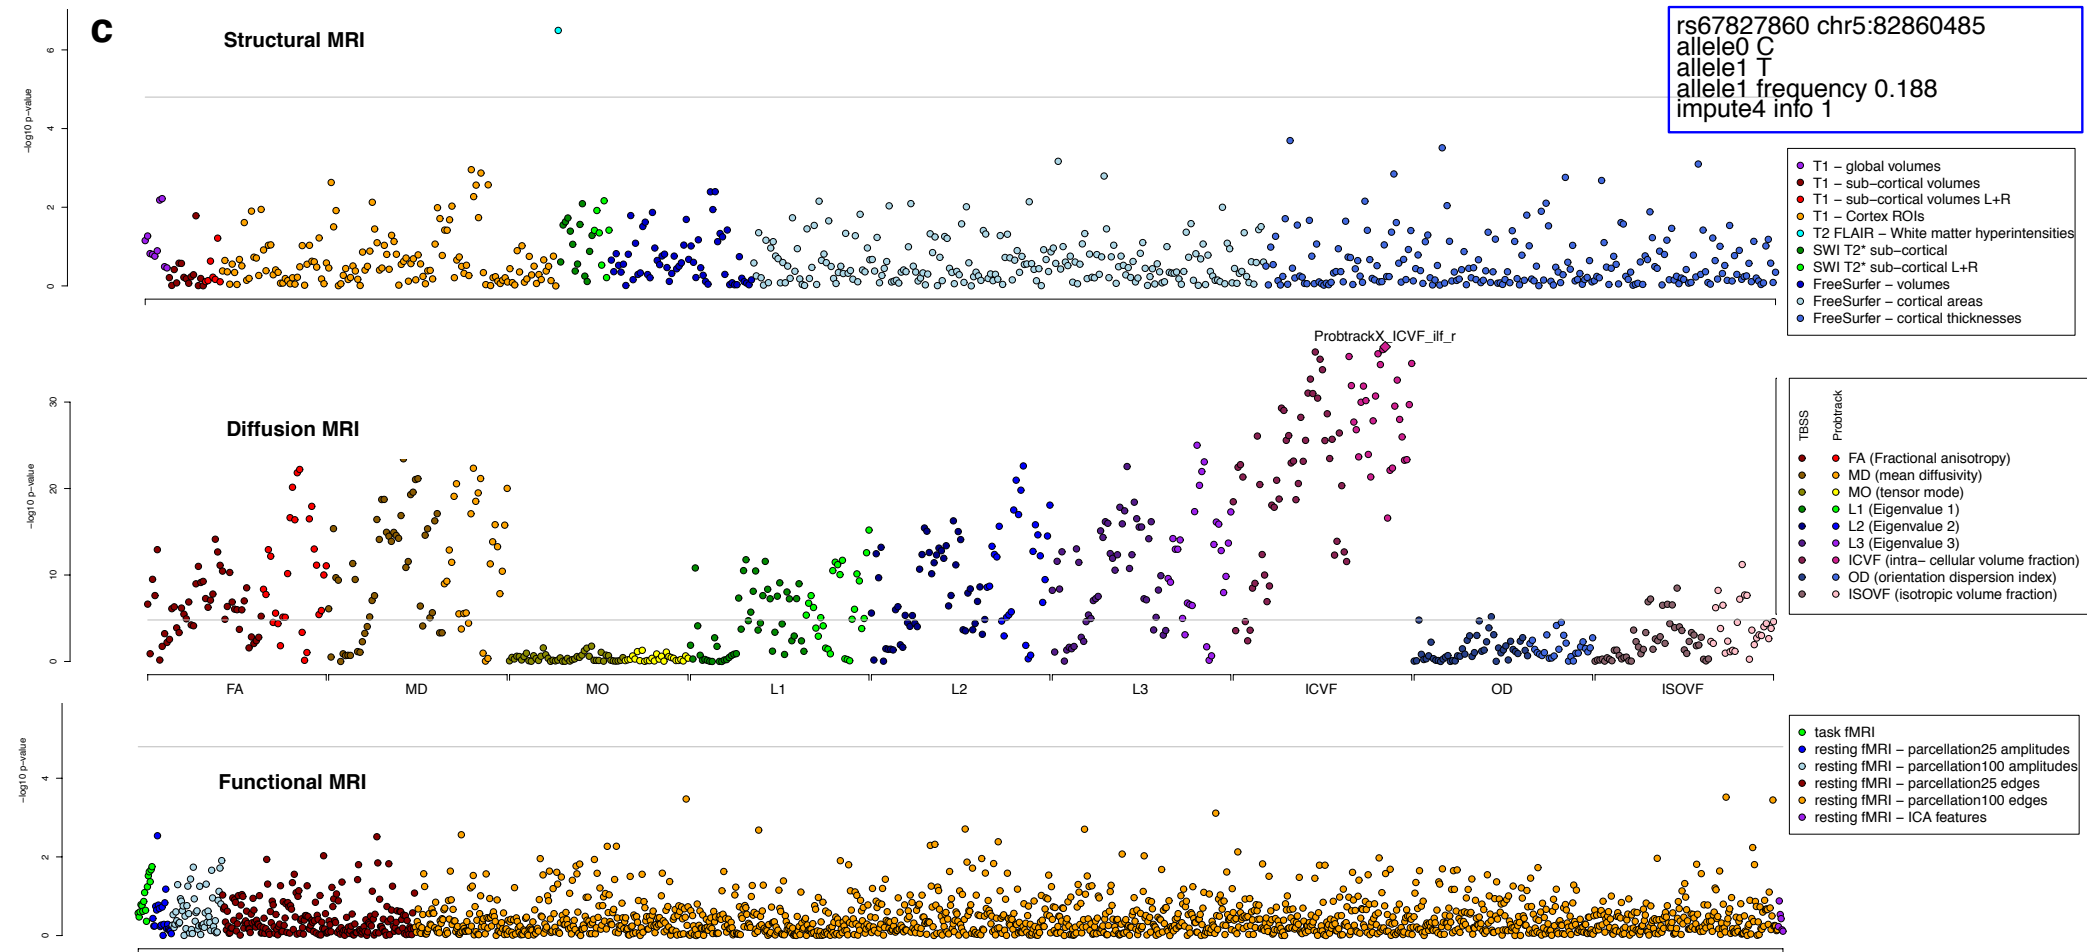

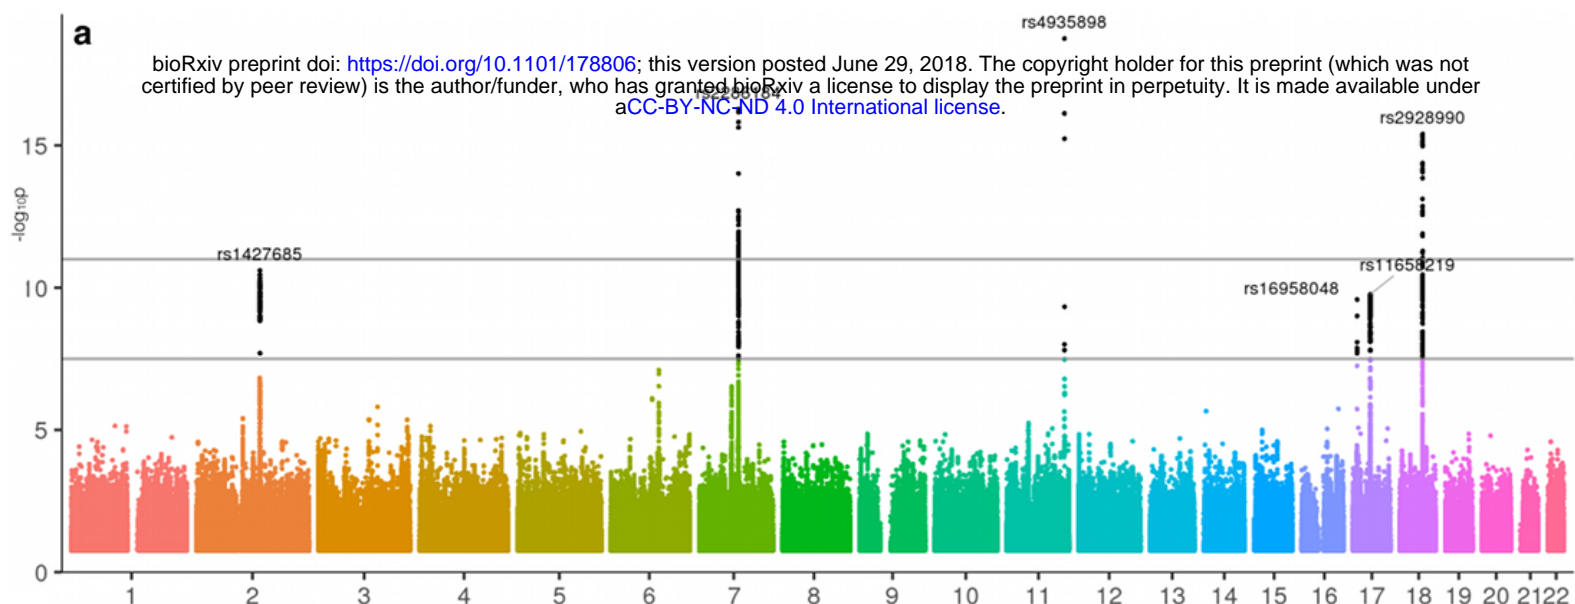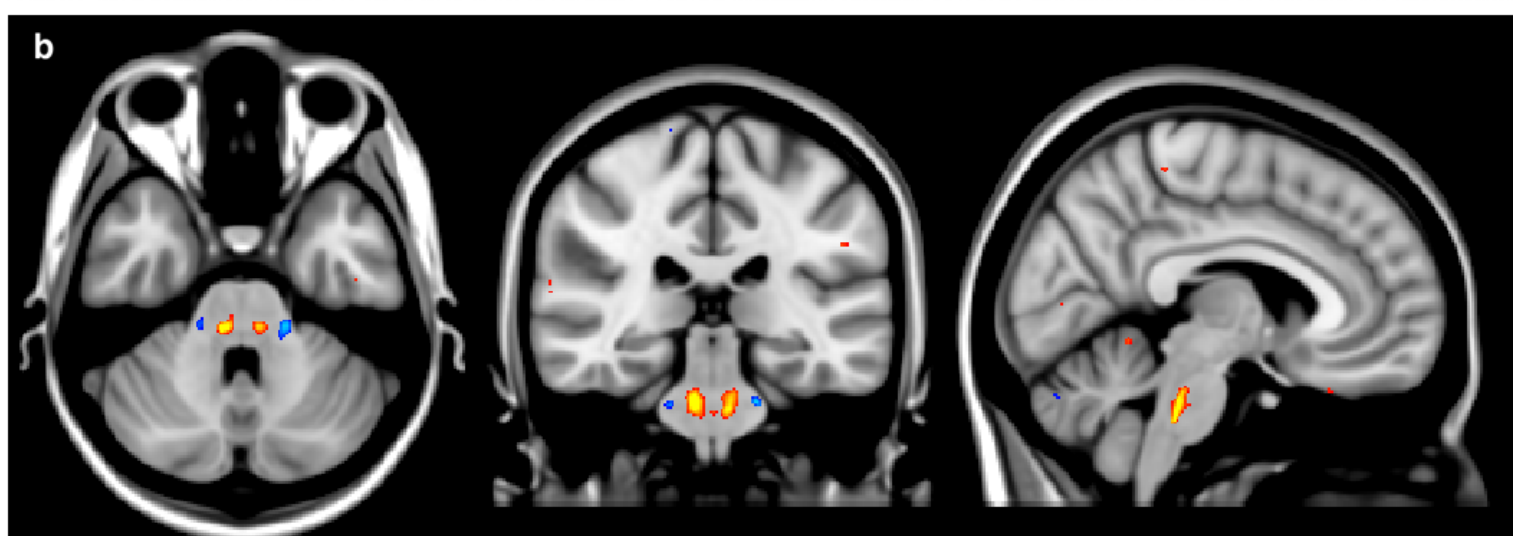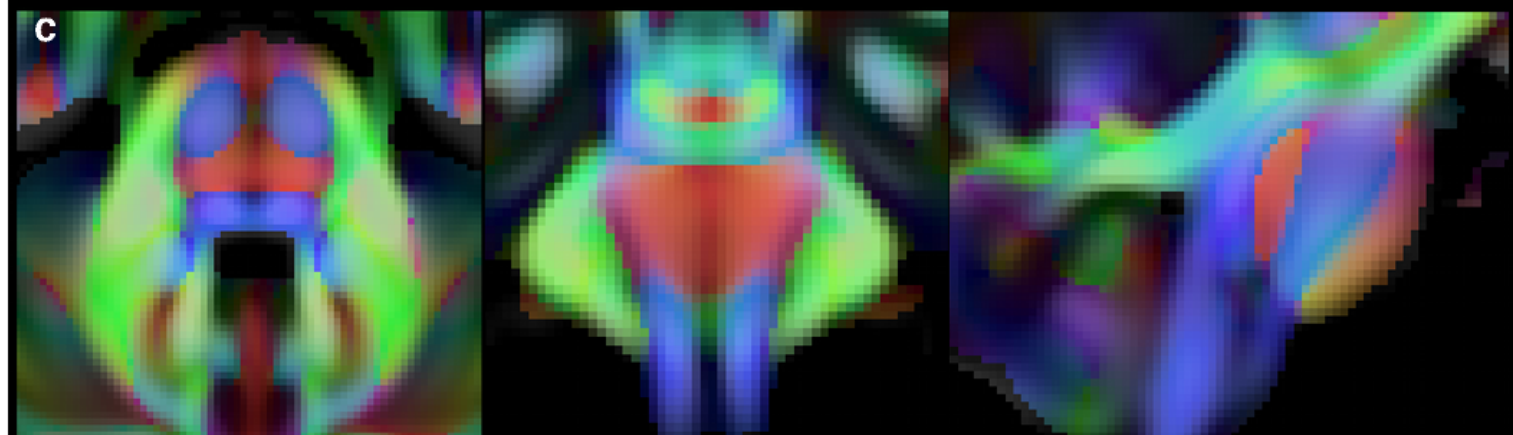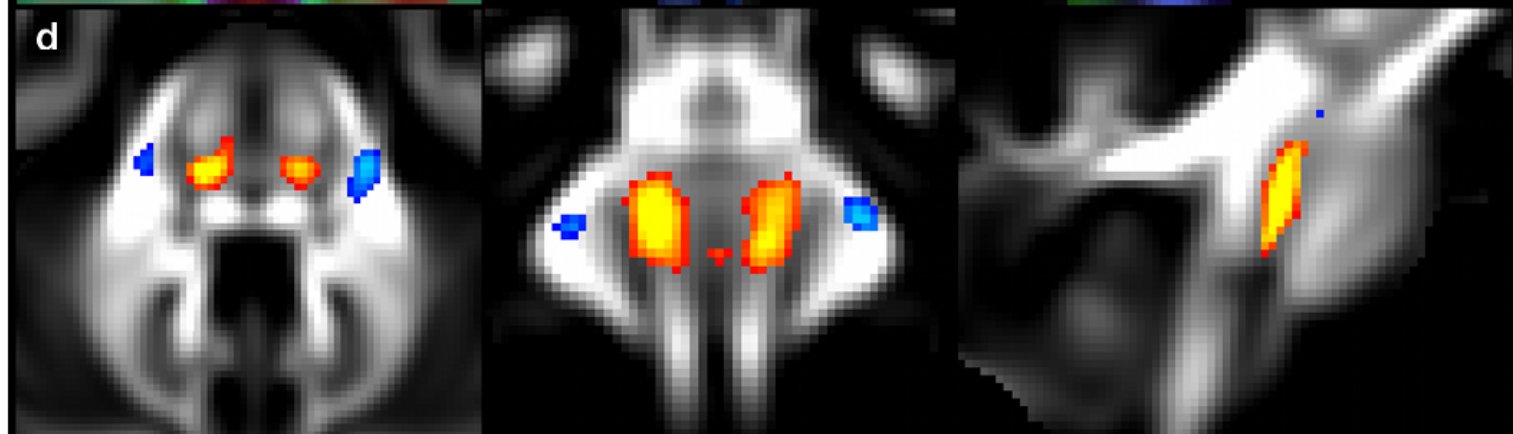

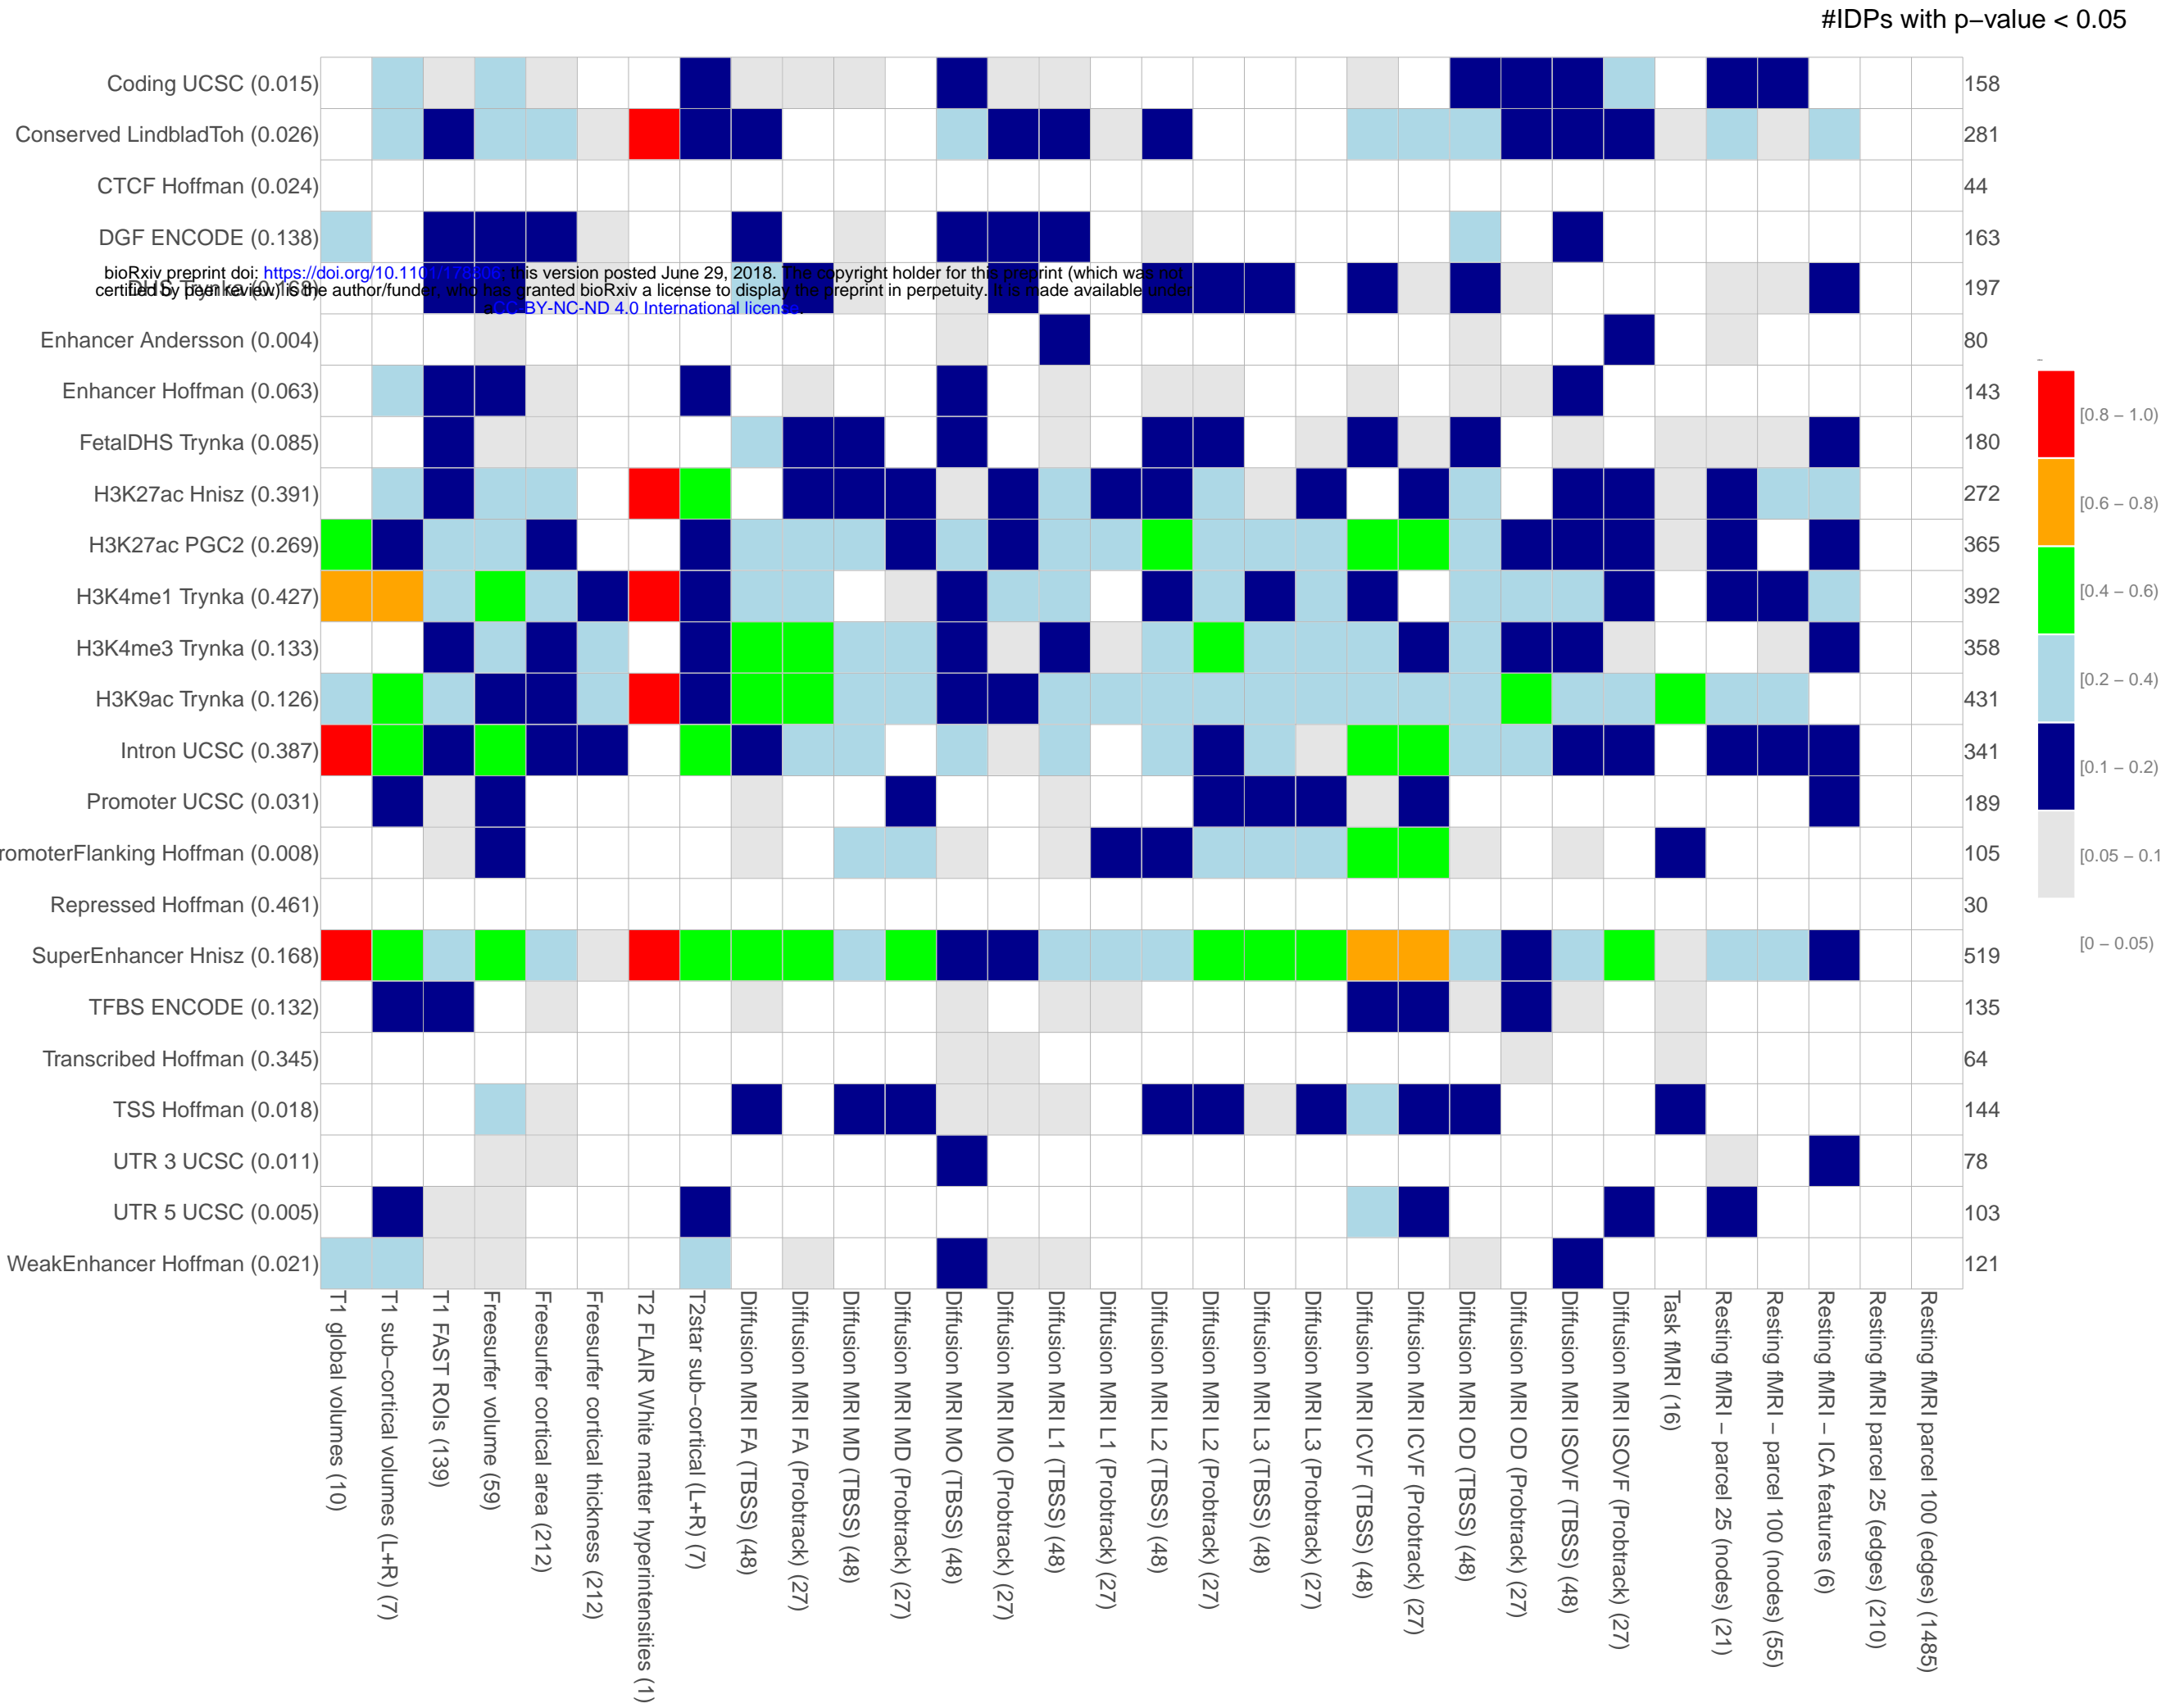

| cluster index | cluster name                                                                                                                                                                              | # IDPs | top IDP                                       | chr | RSID                  | position   | locus              | ref allele | nonref allele | nonref AF | p value  | replication p-value | replication p-value | GTEX eQTL                                               |
|---------------|-------------------------------------------------------------------------------------------------------------------------------------------------------------------------------------------|--------|-----------------------------------------------|-----|-----------------------|------------|--------------------|------------|---------------|-----------|----------|---------------------|---------------------|---------------------------------------------------------|
| 1             | centric by peer review) is the author/funder, who has granted bioRxiv a license to display the preprint in perpetuity. It is made available under aCC-BY-NC-ND 4.0 International license. |        | lum_VIIa                                      |     |                       |            |                    |            |               |           |          |                     |                     |                                                         |
| 2             | dMRI Corpus callosum (genu)                                                                                                                                                               | 1      | dMRI_TBSS_ICVF_Genu_of_corpus_callosum        | 1   | rs2365715             | 156615114  | BCAN               | A          | G             | 0.388     | 5.38E-12 | 4.50E-03            | 1.33E-02            | BCAN. APOA1BP, SYT11                                    |
| 3             | Volume WM lesions                                                                                                                                                                         | 1      | T2_FLAIR_BIANCA_WMH_volume                    | 2   | rs3762515 (5' UTR)    | 56150864   | EFEMP1             | C          | T             | 0.0959    | 4.27E-13 | 1.18E-02            | 4.84E-01            |                                                         |
| 4             | rfMRI Cortical and cerebellar motor nodes and edges                                                                                                                                       | 2      | NODEamps25_0012                               | 2   | rs60873293            | 114092549  | intergenic         | G          | T             | 0.217     | 9.86E-15 | 3.10E-07            | 9.50E-02            | AC016745.3, RP11-480C16.1                               |
| 5             | T2* Pallidum                                                                                                                                                                              | 1      | SWI_T2*_pallidum_L+R                          | 2   | rs6740926             | 190326498  | WDR75              | C          | T             | 0.038     | 1.31E-14 | 3.50E-09            | 3.78E-04            | WDR75                                                   |
| 6             | rfMRI Middle temporal sulcus nodes and edges                                                                                                                                              | 2      | netmat_ICA_003                                | 3   | rs35124509 (missense) | 89521693   | EPHA3              | T          | C             | 0.3853    | 4.49E-22 | 3.27E-09            | 3.73E-03            | EPHA3                                                   |
| 7             | T2* Putamen and pallidum                                                                                                                                                                  | 6      | SWI_T2*_putamen_L+R                           | 3   | rs4428180             | 133466374  | TF                 | A          | G             | 0.152     | 2.23E-22 | 6.11E-07            | 1.03E-03            | TF                                                      |
| 8             | rfMRI Prefrontal and parietal edges                                                                                                                                                       | 1      | netmat_ICA_002                                | 3   | rs2279829 (3' UTR)    | 147106319  | ZIC4               | C          | T             | 0.221     | 8.34E-12 | 5.46E-05            | 2.51E-03            |                                                         |
| 9             | dMRI Superior cerebellar peduncles                                                                                                                                                        | 8      | dMRI_TBSS_ICVF_Superior_cerebellar_peduncle_L | 4   | rs4697414             | 23724255   | RP11-380P13.2      | C          | T             | 0.823     | 5.83E-24 | 1.33E-06            | 4.63E-02            | RP13-497K6.1, RP11-380P13.2                             |
| 10            | Volume Putamen, ventral striatum, cerebellum VIIIb, IX, X; T2* Pallidum; dMRI Cerebral peduncles                                                                                          | 20     | IDP_T1_FAST_ROIs_L_ventral_striatum           | 4   | rs13107325 (missense) | 103188709  | SLC39A8            | C          | T             | 0.073     | 1.04E-42 | 6.64E-20            | 8.97E-06            |                                                         |
| 11            | dMRI Most WM tracts                                                                                                                                                                       | 199    | dMRI_ProbtrackX_ICVF_ill_f_r                  | 5   | rs67827860            | 82860485   | VCAN               | C          | T             | 0.188     | 4.06E-37 | 3.93E-12            | 2.19E-04            |                                                         |
| 12            | rfMRI Parietal and prefrontal edges                                                                                                                                                       | 1      | netmat_ICA_004                                | 5   | rs7442779             | 92788278   | NR2F1-AS1          | A          | G             | 0.05      | 8.18E-15 | 1.90E-04            | 4.04E-02            |                                                         |
| 13            | dMRI Corpus callosum (genu, body, splenium)                                                                                                                                               | 7      | dMRI_TBSS_ICVF_Genu_of_corpus_callosum        | 5   | rs4150221             | 139719991  | HBEGF              | T          | C             | 0.264     | 8.43E-20 | 1.72E-09            | 4.06E-02            | SRA1                                                    |
| 14            | T2* Putamen                                                                                                                                                                               | 3      | SWI_T2*_putamen_L+R                           | 6   | rs1800562 (missense)  | 26093141   | HFE                | G          | A             | 0.0768    | 6.61E-20 | 2.91E-04            | 3.44E-03            | U91328.19                                               |
| 15            | dMRI Crossing pontine tract                                                                                                                                                               | 1      | dMRI_TBSS_MO_Pontine_crossing_tract           | 7   | rs2286184             | 84630516   | SEMA3D             | C          | T             | 0.201     | 5.31E-17 | 6.02E-09            | 1.58E-04            |                                                         |
| 16            | dMRI Corpus callosum (genu)                                                                                                                                                               | 1      | dMRI_TBSS_OD_Genu_of_corpus_callosum          | 7   | rs12113919            | 117612315  | intergenic         | C          | G             | 0.416     | 3.96E-12 | 1.44E-04            | 1.84E-03            | CTTNBP2                                                 |
| 17            | Volume Brain                                                                                                                                                                              | 2      | volume_MaskVol                                | 7   | rs2908004 (missense)  | 120969769  | WNT16              | G          | A             | 0.4455    | 3.55E-16 | 7.07E-09            | 2.50E-04            | CPED1, FAM3C                                            |
| 18            | T2* Putamen                                                                                                                                                                               | 2      | SWI_T2*_putamen_L+R                           | 8   | rs35469695            | 23406169   | SLC25A37           | C          | G             | 0.174     | 2.22E-12 | 2.11E-02            | 2.17E-01            | SLC25A37                                                |
| 19            | Volume Pallidum                                                                                                                                                                           | 3      | T1_FIRST_pallidum_volume_L+R                  | 8   | rs2923405             | 42448126   | SMIM19/SLC20A2     | T          | G             | 0.583     | 3.31E-17 | 1.34E-04            | 5.98E-03            | SMIM19, SLC20A2                                         |
| 20            | T2* Pallidum                                                                                                                                                                              | 2      | SWI_T2*_pallidum_L+R                          | 8   | rs2978098             | 101676675  | SNX31              | A          | C             | 0.468     | 6.43E-15 | 1.08E-05            | 3.23E-01            | SNX31                                                   |
| 21            | Volume Cerebellum                                                                                                                                                                         | 3      | T1_FAST_ROIs_L_cerebellum_crus_I              | 9   | rs72754248            | 119061396  | PAPPA              | G          | A             | 0.069     | 1.38E-17 | 4.23E-06            | 2.01E-01            |                                                         |
| 22            | T2* Pallidum, putamen and caudate                                                                                                                                                         | 17     | SWI_T2*_pallidum_L+R                          | 10  | rs10764176 (missense) | 18,242,311 | SLC39A12           | A          | G             | 0.3       | 3.30E-21 | 1.01E-11            | 9.71E-02            | SLC39A12                                                |
| 23            | T2* Caudate                                                                                                                                                                               | 3      | SWI_T2*_caudate_L+R                           | 10  | rs12570727            | 18,425,519 | CACNB2             | G          | A             | 0.394     | 2.17E-22 | 2.20E-10            | 6.23E-04            | SLC39A12-AS1                                            |
| 24            | rfMRI Parietal, temporal and prefrontal nodes                                                                                                                                             | 20     | NODEamps100_0002                              | 10  | rs2274224 (missense)  | 96039597   | PLCE1              | G          | C             | 0.431     | 6.55E-19 | 1.73E-03            | 7.21E-02            | NOC3L, PLCE1, PLCE1-AS1                                 |
| 25            | rfMRI Prefrontal nodes                                                                                                                                                                    | 6      | NODEamps25_0013                               | 10  | rs11596664            | 134280157  | INPP5A             | C          | T             | 0.439     | 1.97E-15 | 2.23E-05            | 3.60E-02            | INPP5A RP11, 432J24.6                                   |
| 26            | T2* Pallidum                                                                                                                                                                              | 3      | SWI_T2*_pallidum_L+R                          | 11  | rs11230859            | 61769972   | intergenic         | G          | A             | 0.663     | 2.31E-17 | 6.39E-03            | 4.83E-02            |                                                         |
| 27            | dMRI Crossing pontine tract                                                                                                                                                               | 1      | dMRI_TBSS_MO_Pontine_crossing_tract           | 11  | rs4935898 (missense)  | 124742385  | ROBO3              | G          | A             | 0.048     | 1.76E-19 | 2.47E-05            | 2.47E-01            |                                                         |
| 28            | Volume Mesencephalon (WM cerebellum, brainstem)                                                                                                                                           | 3      | volume_Right-Cerebellum-White-Matter          | 12  | rs4301837             | 102336310  | DRAM1 GNPTAB CHPT1 | T          | C             | 0.501     | 3.40E-13 | 3.37E-04            | 1.23E-02            | GNPTAB, CHPT1, DRAM1                                    |
| 29            | Volume Hippocampus                                                                                                                                                                        | 2      | T1_FAST_ROIs_R_hippocampus                    | 12  | rs7315280             | 117320938  | intergenic         | A          | G             | 0.115     | 7.06E-14 | 6.80E-05            | 6.69E-01            | FBXW8, HRK                                              |
| 30            | Volume Putamen                                                                                                                                                                            | 4      | volume_Right-Putamen                          | 14  | rs945270              | 56200473   | intergenic         | C          | G             | 0.419     | 3.67E-14 | 9.27E-06            | 3.32E-03            |                                                         |
| 31            | Volume and area of precuneus and cuneus                                                                                                                                                   | 11     | T1_FAST_ROIs_R_intracalc_cortex               | 14  | rs74826997            | 59628609   | DAAM1              | T          | C             | 0.125     | 2.46E-16 | 3.08E-07            | 2.88E-02            | L3HYPDH, JKAMP                                          |
| 32            | Thickness, area and volume of primary sensorimotor cortex                                                                                                                                 | 15     | a2009s_lh_s_central_area                      | 15  | rs4924345             | 39639898   | RP11-624L4.1       | A          | C             | 0.081     | 3.27E-53 | 1.69E-27            | 1.01E-06            |                                                         |
| 33            | Volume 4th ventricle                                                                                                                                                                      | 1      | volume_4th-Ventricle                          | 15  | rs2642636             | 58363242   | ALDH1A2            | C          | G             | 0.415     | 5.24E-16 | 5.63E-03            | 1.81E-01            | ALDH1A2, AQP9                                           |
| 34            | dMRI Uncinate                                                                                                                                                                             | 4      | dMRI_ProbtrackX_ISOVF_unc_r                   | 16  | rs7197215             | 51449978   | intergenic         | A          | G             | 0.566     | 2.24E-15 | 4.50E-02            | 1.43E-04            |                                                         |
| 35            | Volume Cerebellum IX                                                                                                                                                                      | 2      | T1_FAST_ROIs_L_cerebellum_IX                  | 17  | rs9905515             | 35261073   | RP11-445F12.1      | G          | C             | 0.23      | 3.32E-13 | 9.84E-06            | 2.70E-04            |                                                         |
| 36            | T2* Caudate and putamen                                                                                                                                                                   | 6      | SWI_T2*_putamen_L+R                           | 17  | rs668799              | 40716235   | COASY              | C          | T             | 0.278     | 1.43E-17 | 1.79E-04            | 9.86E-04            | TUBG2, CNTNAP1, FAM134C, NAGLU, BECN1, HSD17B1, PLEKHH3 |
| 37            | Volume WM lesions                                                                                                                                                                         | 1      | T2_FLAIR_BIANCA_WMH_volume                    | 17  | rs3744020             | 73871773   | TRIM47             | G          | A             | 0.188     | 1.15E-12 | 6.05E-06            | 3.36E-02            | TRIM47, TRIM65, RP11-552F3.9, etc.                      |
| 38            | dMRI Crossing pontine tract                                                                                                                                                               | 1      | dMRI_TBSS_MO_Pontine_crossing_tract           | 18  | rs2928990             | 49421125   | intergenic         | T          | G             | 0.898     | 3.97E-16 | 3.96E-05            | 2.27E-03            |                                                         |

**Table 1: Summary of most highly associated SNP-IDP clusters.** The table summarises the 38 clusters of SNP-

bioRxiv preprint doi: <https://doi.org/10.1101/178806>; this version posted June 29, 2018. The copyright holder for this preprint (which was not certified by peer review) is the author/funder, who has granted bioRxiv a license to display the preprint in perpetuity. It is made available under aCC-BY-NC-ND 4.0 International license.

associations. For each cluster, the most significant association between a SNP and an IDP is detailed by the chromosome, rsID, base-pair position, SNP alleles, non-reference allele frequency, p-value in the discovery sample and the replication p-values. The locus column details a gene if the SNP is in that gene. If we found a coding SNP or eQTL in high LD with the lead SNP, then this is reported instead.
